# Supplementary material for: Change in prevalence of psychological and economic abuse, and controlling behaviours against women by an intimate partner in two cross-sectional studies in New Zealand, 2003 and 2019
Source: PubMed Central journal article supplement — BMJ Open. 2021 Mar 23;11(3):e044910. doi: 10.1136/bmjopen-2020-044910 (PMC7993235; doi:10.1136/bmjopen-2020-044910), 2021-03-23
Supplement: bmjopen-2020-044910.draft_revisions.pdf [file bmjopen-2020-044910.draft_revisions.pdf]

# BMJ Open

BMJ Open is committed to open peer review. As part of this commitment we make the peer review history of every article we publish publicly available.

When an article is published we post the peer reviewers' comments and the authors' responses online. We also post the versions of the paper that were used during peer review. These are the versions that the peer review comments apply to.

The versions of the paper that follow are the versions that were submitted during the peer review process. They are not the versions of record or the final published versions. They should not be cited or distributed as the published version of this manuscript.

BMJ Open is an open access journal and the full, final, typeset and author-corrected version of record of the manuscript is available on our site with no access controls, subscription charges or pay-per-view fees (<http://bmjopen.bmj.com>).

If you have any questions on BMJ Open's open peer review process please email [info.bmjopen@bmj.com](mailto:info.bmjopen@bmj.com)

# BMJ Open

## Change in prevalence rates for psychological and economic abuse, and controlling behaviors against women by an intimate partner in two cross-sectional studies in New Zealand, 2003-2019

|                               |                                                                                                                                                                                                                                                                                                                                                                                                                                                                                                                                                                                |
|-------------------------------|--------------------------------------------------------------------------------------------------------------------------------------------------------------------------------------------------------------------------------------------------------------------------------------------------------------------------------------------------------------------------------------------------------------------------------------------------------------------------------------------------------------------------------------------------------------------------------|
| Journal:                      | <i>BMJ Open</i>                                                                                                                                                                                                                                                                                                                                                                                                                                                                                                                                                                |
| Manuscript ID                 | bmjopen-2020-044910                                                                                                                                                                                                                                                                                                                                                                                                                                                                                                                                                            |
| Article Type:                 | Original research                                                                                                                                                                                                                                                                                                                                                                                                                                                                                                                                                              |
| Date Submitted by the Author: | 06-Oct-2020                                                                                                                                                                                                                                                                                                                                                                                                                                                                                                                                                                    |
| Complete List of Authors:     | Fanslow, Janet; The University of Auckland Faculty of Medical and Health Sciences, School of Population Health<br>Malihi, Zarintaj; The University of Auckland Faculty of Medical and Health Sciences, School of Population Health<br>Hashemi, Ladan; The University of Auckland Faculty of Medical and Health Sciences, School of Population Health<br>Gulliver, Pauline; The University of Auckland Faculty of Medical and Health Sciences, School of Population Health<br>McIntosh, Tracey; The University of Auckland Faculty of Arts, Indigenous Studies, Faculty of Arts |
| Keywords:                     | PUBLIC HEALTH, EPIDEMIOLOGY, SOCIAL MEDICINE                                                                                                                                                                                                                                                                                                                                                                                                                                                                                                                                   |
|                               |                                                                                                                                                                                                                                                                                                                                                                                                                                                                                                                                                                                |

SCHOLARONE™  
Manuscripts

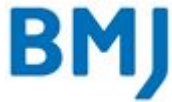

I, the Submitting Author has the right to grant and does grant on behalf of all authors of the Work (as defined in the below author licence), an exclusive licence and/or a non-exclusive licence for contributions from authors who are: i) UK Crown employees; ii) where BMJ has agreed a CC-BY licence shall apply, and/or iii) in accordance with the terms applicable for US Federal Government officers or employees acting as part of their official duties; on a worldwide, perpetual, irrevocable, royalty-free basis to BMJ Publishing Group Ltd ("BMJ") its licensees and where the relevant Journal is co-owned by BMJ to the co-owners of the Journal, to publish the Work in this journal and any other BMJ products and to exploit all rights, as set out in our [licence](#).

The Submitting Author accepts and understands that any supply made under these terms is made by BMJ to the Submitting Author unless you are acting as an employee on behalf of your employer or a postgraduate student of an affiliated institution which is paying any applicable article publishing charge ("APC") for Open Access articles. Where the Submitting Author wishes to make the Work available on an Open Access basis (and intends to pay the relevant APC), the terms of reuse of such Open Access shall be governed by a Creative Commons licence – details of these licences and which [Creative Commons](#) licence will apply to this Work are set out in our licence referred to above.

Other than as permitted in any relevant BMJ Author's Self Archiving Policies, I confirm this Work has not been accepted for publication elsewhere, is not being considered for publication elsewhere and does not duplicate material already published. I confirm all authors consent to publication of this Work and authorise the granting of this licence.

1  
2  
3 Title: Change in prevalence rates for psychological and economic abuse, and controlling  
4  
5 behaviors against women by an intimate partner in two cross-sectional studies in New  
6  
7  
8 Zealand, 2003-2019  
9

10  
11 Change in prevalence rates for psychological and economic abuse, and  
12  
13 controlling behaviors against women by an intimate partner in two cross-  
14  
15 sectional studies in New Zealand, 2003-2019  
16

17  
18 Janet Fanslow, <sup>a</sup> Zarintaj Malihi <sup>a</sup>, Ladan Hashemi, <sup>a</sup> Pauline Gulliver, <sup>a</sup> and  
19  
20 Tracey McIntosh<sup>b</sup>  
21

22 <sup>a</sup> *Social and Community Health, School of Population Health, Faculty of Medical and Health*  
23 *Sciences, University of Auckland, Auckland, New Zealand*

24 <sup>b</sup> *Indigenous Studies, Faculty of Arts, University of Auckland, Auckland, New Zealand*  
25  
26  
27  
28

29 \*Corresponding Author:  
30 Janet L. Fanslow  
31

32  
33 Social and Community Health  
34 School of Population Health  
35 University of Auckland  
36 Private Bag 92019  
37 Auckland, 1142  
38 Auckland, New Zealand  
39

40  
41 [j.fanslow@auckland.ac.nz](mailto:j.fanslow@auckland.ac.nz)  
42  
43  
44  
45

46 word counts=3179  
47  
48  
49

50  
51 keywords: change, prevalence rates, Intimate Partner Violence  
52  
53  
54  
55  
56  
57  
58  
59  
60

1  
2  
3 **Title: Change in prevalence rates for psychological and economic abuse, and controlling**  
4 **behaviors against women by an intimate partner in two cross-sectional studies in New**  
5 **Zealand, 2003-2019**  
6  
7  
8  
9

10 **ABSTRACT**  
11

12  
13 **Objectives** Changes in reported lifetime prevalence of psychological abuse, controlling  
14 behaviours and economic abuse between 2003 and 2019, and past 12-month for psychological  
15 abuse by an intimate partner were examined.  
16  
17  
18  
19

20  
21 **Design** Cross-sectional analysis  
22

23  
24 **Setting and participants** Data came from two surveys of family violence in New Zealand  
25 conducted in 2003 and 2019. Respondents were aged 18-64 years old (2003, n=2674 2019  
26 n=944).  
27  
28  
29

30  
31 **Main outcome measures** prevalence rates for psychological abuse, controlling behaviours and  
32 economic abuse were compared between the two study years using logistic regression.  
33 Sociodemographic and economic correlates of each abuse sub-type were investigated.  
34 Interactions between sociodemographic factors and the study year for reported prevalence rates  
35 were examined.  
36  
37  
38  
39  
40  
41  
42  
43

44 **Results** There was a reduction in reported past 12-month experience of at least two acts of  
45 psychological IPV from 7.7% (95%confidence interval CI=6.8-8.8) in 2003 to 4.8%  
46 (95%CI=3.5-6.3) in 2019. The reported lifetime prevalence of at least two acts of controlling  
47 behaviours increased from 7.5 (95%CI=6.5, 8.5) in 2003 to 14.1 (95%CI=11.9, 16.5) in 2019.  
48 Lifetime prevalence economic IPV also increased from 4.4 (95%CI=3.5, 5.3) in 2003 to 9.5  
49 (95%CI=7.5, 11.7) in 2019. Those who were divorced/separated or cohabiting, and those living  
50 in the most deprived areas were more likely to report past year psychological IPV, lifetime  
51 controlling behaviours and economic abuse. Women with primary/secondary education  
52  
53  
54  
55  
56  
57  
58  
59  
60

1  
2  
3 reported significantly less past 12-month psychological abuse in 2019 than those in 2003. A  
4  
5 higher proportion of women who were married or cohabited reported controlling behaviours in  
6  
7 2019 compared with 2003.  
8  
9

10 **Conclusion** The changes in reported past year psychological IPV, and lifetime prevalence of  
11  
12 controlling behaviours and economic abuse from 2003 to 2019 is worth critical evaluation.  
13  
14 Results highlight the importance of measuring multiple forms of IPV independently and can  
15  
16 inform policy makers about gaps in IPV prevention, and response programmes.  
17  
18  
19  
20  
21  
22  
23

#### 24 **Strengths and limitations of this study**

- 25  
26  
27 • The reported study used large, representative samples of women collected in 2003 and  
28  
29 2019.
- 30  
31 • Measures of lifetime exposure provide information on overall experience of  
32  
33 psychological abuse, controlling behaviours and economic abuse.
- 34  
35 • Regular surveys of violence exposure provide an understanding of the effectiveness of  
36  
37 population-based policies and programmes.
- 38  
39 • Observed changes may reflect societal changes or environmental factors not  
40  
41 considered in this investigation.
- 42  
43 • Self-report of violence exposure, while the gold standard for data collection, may  
44  
45 underestimate the true prevalence
- 46  
47  
48 • **Funding statement** This work was supported by the Health Research Council of New  
49  
50 Zealand (Grant 02/207) for 2003 study and the New Zealand Ministry of Business,  
51  
52 Innovation and Employment, Contract number CONT-42799-HASTR-UOA for 2019  
53  
54 study.
- 55  
56 • We declare that there is no conflict of interest. The funding organization had no role  
57  
58 in the design and conduct of the study; in the collection, analysis, and interpretation of  
59  
60 the data; and in the preparation, review, or approval of the manuscript.

1  
2  
3  
4  
5  
6  
7  
8  
9  
10  
11  
12  
13  
14  
15  
16  
17  
18  
19  
20  
21  
22  
23  
24  
25  
26  
27  
28  
29  
30  
31  
32  
33  
34  
35  
36  
37  
38  
39  
40  
41  
42  
43  
44  
45  
46  
47  
48  
49  
50  
51  
52  
53  
54  
55  
56  
57  
58  
59  
60

For peer review only

## Introduction

Psychological abuse (also known as emotional abuse), economic abuse and controlling behaviours are tacit but prevalent types of intimate partner violence (IPV), which can result in serious health outcomes, including death.[1–10] However, these types of violence have been historically neglected in research and practice[2,4,11] because the focus has been on gaining recognition about physical and sexual IPV, and the difficulties associated with the measurement of these types of behaviours. More recently, population-based studies assessed the prevalence of recent (past 12-month) and lifetime experiences of psychological, economic abuse and controlling behaviours against women in high-income countries[1,12–14] and low and middle-income countries.[5,15–17]

There is a lack of consensus on how to measure these forms of abuse. For example, some previous research has classified controlling behaviours and economic abuse under the larger umbrella of psychological/emotional abuse[2,6,7,18,19] while others report them separately.[13,20,21] Similarly, there is a lack of consensus on the measurement of economic abuse, with economic control, employment sabotage, and economic exploitation three commonly identified tactics which are not always measured.[22]

Previous research has found a strong correlation between sexual, physical and psychological, and economic forms of abuse[14,23,24] with some suggesting that psychological abuse may precede physical IPV.[25,26] Looking at patterns of change for these types of abuse at different time points can help us understand if they are distinct phenomena. Additionally, comparing results of prevalence rates and risk factors for psychological abuse, controlling behaviours and economic abuse in repeated cross sectional studies can help to a) identify trends, gaps and sociodemographic associates for these types of abuse, independent of physical and sexual IPV, and b) better tailor prevention strategies.



1  
2  
3 New Zealand is one of a small number of countries [6,27–30] to have conducted repeated  
4 population based surveys that include measures of psychological abuse, controlling  
5 behaviours and economic abuse. The first survey was conducted in 2003,[31] and the repeat  
6 survey was conducted in 2019. Between the two surveys, a series of actions were taken to  
7 address family violence including; legislation (e.g. amendments to family violence law and  
8 protection for victims act)[32], and prevention campaigns (e.g. the Family Violence: It's not  
9 ok national campaign, and ACC-funded mates and dates high schools programme on healthy  
10 relationships).[33]  
11  
12  
13  
14  
15  
16  
17  
18  
19  
20  
21

22 In the current investigation, we seek to understand the impact of population-based strategies  
23 on women's experience of psychological abuse, controlling behaviours and economic abuse.  
24 It is important to note, however, that in line with the majority of countries who have sought to  
25 develop population-based strategies to impact on the prevalence of intimate partner violence,  
26 the efforts in Aotearoa New Zealand have also primarily focused on the response to physical  
27 abuse. In addition to estimating the change in prevalence estimates, we tested if women's  
28 sociodemographic characteristics were associated with each of the outcome variables. To  
29 understand which groups of women reported an increase or reduction between the two years,  
30 we also explored the interaction between the sociodemographic characteristics and the study  
31 year.  
32  
33  
34  
35  
36  
37  
38  
39  
40  
41  
42  
43  
44  
45  
46  
47  
48  
49  
50  
51  
52  
53  
54  
55  
56  
57  
58  
59  
60

## METHODS

### Study design, location, and participants

The present study used data from two national cross-sectional studies on family violence conducted in New Zealand in 2003 and 2019. Details on methods for these studies are published elsewhere [31](Fanslow *et al*, *Kotuitui*, 2020). In brief, in the 2003 study women were recruited from Auckland and North Waikato regions, and in the 2019 study women were recruited from Auckland, Waikato, and Northland. Cluster randomization was used for both studies. Meshblock boundaries, provided by Stats NZ, were used as the starting point for recruitment. Meshblocks are smallest statistical units that are used for the Census surveys. Non-residential and short-term residential properties, rest homes and retirement villages were excluded from both surveys.

Ethics approval was received from the University of Auckland human participants ethics committee with references numbers of 2002/199 in 2003, and 2015/ 018244 in 2019 studies.

### Patients and Public involvement

Patients or the public were not involved in the design, conduct or reporting or dissemination plans of our research.

**Eligibility:** Potential participants were household members who had been living in that address for at least one month, aged 18-64 years (for the 2003 study), or 16 years and above (for the 2019 study), and able to speak conversational English. In 2003, 2,674 ever-partnered women aged 18-64 were recruited, and in 2019, 2,888 (n=1464 women, n=1423 men, n=1 other) were recruited. To ensure comparability of the sample populations, only women aged between 18 and 64 years were included in this investigation.

1  
2  
3 **Data collection** The questionnaire developed for the World Health Organization Multi-  
4  
5 Country Study on Domestic Violence and Women's Health (WHO MCS) was used to  
6  
7 measure violence against women in both studies.[34]  
8  
9

10 For selection of individuals within a household, we identified all woman aged over 16 years  
11  
12 residing in the household. Then, we listed these on the random selection form in order of  
13  
14 oldest to youngest. For participants' safety, interviewers only interviewed one randomly  
15  
16 selected woman per household. Participants provided informed consent. No one over the age  
17  
18 of two years was present during the interview. All respondents were provided with a list of  
19  
20 approved support agencies regardless of disclosure status at the conclusion of the face-to-face  
21  
22 interview.  
23  
24  
25

26  
27 The number of people invited and those who were interviewed and included in each of the  
28  
29 analyses are presented in flowchart diagram (**Figure 1**). The response rate relative to total  
30  
31 eligible women was 66.9% in 2003 and 63.7% in 2019. The number of ever-partnered  
32  
33 women aged 18-64 years was 2,674 in 2003 and 944 in 2019. For economic abuse, in 2003  
34  
35 questions were asked for currently partnered participants only. To ensure consistency, we  
36  
37 used currently partnered sample for this outcome in 2019. This reduced the total sample size  
38  
39 for economic abuse to 2,123 in 2003 and 802 in 2019, respectively.  
40  
41  
42  
43

#### 44 **Outcome measures**

45  
46

47 Outcome variables are defined in **Supplementary Table 1**. We initially report on the  
48  
49 prevalence of one or two or more acts for life-time and past-year psychological abuse, as well  
50  
51 as controlling behaviours. Further analyses considers only two or more acts of psychological  
52  
53 abuse and controlling behaviours to distinguish systematic abuse from a one-off incident. We  
54  
55 measured two acts of "economic control" in both surveys. Women who reported having  
56  
57 experienced either or both acts were classified as having experienced economic abuse.  
58  
59  
60

1  
2  
3 For psychological abuse, past 12-month and lifetime experience was measured at both study  
4 years. For controlling behaviours and economic abuse, only lifetime experience of the abuse  
5 was measured at both study years.  
6  
7  
8  
9

### 10 **Independent variables**

11  
12 Sociodemographic variables such as age, education, marital status, access to independent  
13 source of income and family support were self-reported by respondents. We used the Index of  
14 Multiple Deprivation (IMD) to determine area level deprivation.[35] See **Supplementary**  
15 **Table 2** for a description of independent variables.  
16  
17  
18  
19  
20  
21  
22

### 23 **Statistical analyses:**

24 SAS statistical package (version 9.4) was used for data analyses (SAS Institute, Cary, NC,  
25 USA). Missing data including were excluded from all analyses. These include: do not know  
26 or do not remember, and no responses.  
27  
28  
29  
30  
31  
32

33 Using the merged database , first, the study years were compared in terms of  
34 sociodemographic variables, independent source of income, area deprivation level, and  
35 family support using chi square tests.  
36  
37  
38  
39  
40

41 Then, the prevalence rates for each outcome were compared between the study years. For  
42 each of three abuse types, results are presented as percentages (95%Confidence  
43 intervals=CI). Then, to determine if there had been a change in estimated prevalence over  
44 time, odds ratio (OR) and 95%CIs for reported experience of each outcome were determined  
45 using univariate logistic regression models in the merged database, with the study year as a  
46 predictor.  
47  
48  
49  
50  
51  
52  
53  
54

55 Then, the following steps were taken to address further research questions:  
56  
57  
58  
59  
60

- 1  
2  
3 1. The association between each independent variable and each outcome (psychological  
4 abuse, controlling behaviour and economic abuse) was identified using univariate  
5  
6 logistic regression models.  
7  
8
- 9  
10 2. To determine if the relationship between independent and outcome variables remained  
11  
12 significant across data collection periods, those variables for which a significant  
13  
14 association was identified at the univariate level were included in the multivariate  
15  
16 analyses, including the study year. Potential confounders (e.g. age, education,  
17  
18 relationship status, independent income, and area deprivation level) were also included  
19  
20 in multi-variate analyses.  
21  
22
- 23  
24 3. To determine if independent variables influenced the prevalence change between the  
25  
26 study years, interaction tests were conducted between each of the significant variables  
27  
28 and study year.  
29  
30  
31  
32  
33  
34  
35  
36  
37  
38  
39  
40  
41  
42  
43  
44  
45  
46  
47  
48  
49  
50  
51  
52  
53  
54  
55  
56  
57  
58  
59  
60

## RESULTS

Sociodemographic differences between study samples are described in **Table 1**. There was a smaller proportion of people aged 55 years and older in the 2003 sample (15.6%) compared with the 2019 sample (25.8%), and a smaller proportion of participants with tertiary education in the 2003 sample (44.5%) compared with the 2019 sample (66.5%). In the 2003 sample, a higher proportion of participants lived in the least deprived areas (34.3%) compared with the 2019 sample (28.6%).

**Table 1 Characteristics of ever-partnered women aged 18-64 years in 2003 and 2019 studies of family violence**

|                                  | <b>2003</b> | <b>2019</b> | p-value |
|----------------------------------|-------------|-------------|---------|
| Total sample                     | 2674        | 944         |         |
| <b>Age</b>                       |             |             | <0.001  |
| 18-<30                           | 401 (15.0)  | 115 (12.2)  |         |
| 30-<45                           | 1219 (45.6) | 317 (33.6)  |         |
| 45-<55                           | 637 (23.8)  | 268 (28.4)  |         |
| >=55                             | 417 (15.6)  | 244 (25.8)  |         |
| <b>Education</b>                 |             |             | <0.001  |
| Primary/secondary                | 1478 (55.5) | 315 (33.5)  |         |
| Tertiary                         | 1187 (44.5) | 625 (66.5)  |         |
| <b>Relationship status</b>       |             |             | 0.79    |
| Married                          | 1685 (63.1) | 601 (63.7)  |         |
| Cohabiting                       | 574 (21.5)  | 201 (21.3)  |         |
| Divorced/separated/<br>broken up | 353 (13.2)  | 117 (12.4)  |         |
| Widowed/partner died             | 60 (2.2)    | 25 (2.6)    |         |
| <b>Independent income</b>        |             |             | <0.001  |
| Yes                              | 2122 (79.4) | 696 (73.7)  |         |
| No                               | 551 (20.6)  | 248 (26.3)  |         |
| <b>Deprivation</b>               |             |             | <0.001  |
| Least deprived                   | 914 (34.3)  | 270 (28.6)  |         |
| Moderately deprived              | 1045 (39.2) | 393 (41.6)  |         |
| Most deprived                    | 708 (26.5)  | 281 (29.8)  |         |
| <b>Family support</b>            |             |             | 0.35    |
| Yes                              | 2403 (90.1) | 855 (91.3)  |         |
| No                               | 264 (9.9)   | 81 (8.6)    |         |

1  
2  
3 Table 2 shows the reported prevalence of experiencing past 12-month and lifetime  
4 psychological abuse by women in 2003 and 2019. There was no significant difference in  
5 reported prevalence estimates for lifetime psychological experience between 2003 and 2019.  
6  
7  
8  
9  
10 There was no difference in reported prevalence rates for one act of the past 12-month  
11 psychological abuse between 2003 and 2019 (OR=0.84; 95%CI= 0.68, 1.04). There was a  
12 significant decrease in reported prevalence rates for two acts of past 12-month psychological  
13 abuse from 7.7% in 2003 to 4.8% in 2019 (OR =0.60; 95%CI=0.43, 0.83).  
14  
15  
16  
17  
18  
19  
20 There was a significant increase in the reported prevalence rates for lifetime experience of at  
21 least two acts of controlling behaviour from 7.5% in 2003 to 14.1% in 2019 (OR=2.03; 95%  
22 CI=1.61, 2.56). Similarly, there was an increase in the reported prevalence rates for lifetime  
23 experience of one act of economic abuse from 4.4% in 2003 to 9.5% in 2019 (OR=2.28  
24 ;95%CI=1.67, 3.13) (Table 2).  
25  
26  
27  
28  
29  
30  
31  
32  
33  
34  
35  
36  
37  
38  
39  
40  
41  
42  
43  
44  
45  
46  
47  
48  
49  
50  
51  
52  
53  
54  
55  
56  
57  
58  
59  
60

Table 2 Prevalence of recent (last 12 months) and lifetime psychological violence, lifetime economic abuse, and lifetime controlling behaviour against women aged 18-64 years in two cross-sectional studies in New Zealand and their changes

| Violence type                  | Lifetime<br>n% (95%CI)   |                         | Odds ratio 95%CI  | Past 12 months<br>n% (95%CI) |                         | Odds ratio 95%CI  |
|--------------------------------|--------------------------|-------------------------|-------------------|------------------------------|-------------------------|-------------------|
|                                | 2003                     | 2019                    |                   | 2003                         | 2019                    |                   |
| <b>Psychological abuse (n)</b> | (n=2674)                 | (n=944)                 |                   | (n=2674)                     | (n=944)                 |                   |
| Insulted                       | 1217<br>45.6 (43.7-47.5) | 424<br>45.0 (41.8-48.2) | 0.98 (0.84, 1.13) | 368<br>13.8 (12.5-15.2)      | 104<br>11.0 (9.1-13.2)  | 0.77 (0.61, 0.97) |
| Humiliated                     | 805<br>30.2 (28.4-32.0)  | 306<br>32.5 (29.6-35.6) | 1.12 (0.95, 1.31) | 187<br>7.0 (6.1-8.1)         | 54<br>5.7 (4.3-7.4)     | 0.80 (0.60, 1.10) |
| Intimidated                    | 705<br>26.4 (24.7-28.1)  | 249<br>26.5 (23.7-29.4) | 1.00 (0.84, 1.19) | 151<br>5.7 (6.1-8.1)         | 24<br>2.5 (1.6-3.8)     | 0.43 (0.28, 0.67) |
| Threatened                     | 501<br>18.8 (17.3-20.3)  | 158<br>16.8 (14.4-19.3) | 0.87 (0.72, 1.06) | 78<br>2.9 (6.1-8.1)          | 10<br>1.1 (0.5-1.9)     | 0.36 (0.18, 0.69) |
| At least one act of abuse      | 1368<br>51.2 (49.3-53.1) | 494<br>52.4 (49.2-55.7) | 1.05 (0.90, 1.21) | 430<br>16.1 (14.7-17.5)      | 131<br>13.9 (11.7-16.3) | 0.84 (0.68, 1.04) |
| At least two acts of abuse     | 922<br>34.5 (32.7-36.3)  | 331<br>35.1 (32.1-38.3) | 1.03 (0.88, 1.20) | 207<br>7.7 (6.8-8.8)         | 45<br>4.8 (3.5-6.3)     | 0.60 (0.43-0.83)  |
| <b>Economic abuse (n)</b>      | 2123                     | 802                     |                   |                              |                         |                   |
| Taken your money               | 53<br>2.5 (1.9, 3.3)     | 45<br>5.6 (4.1, 7.5)    | 2.31 (1.54, 3.46) |                              |                         |                   |
| Refused to give money          | 60                       | 59                      | 2.74 (1.89, 3.97) |                              |                         |                   |



|                                 |                          |                          |                   |  |  |
|---------------------------------|--------------------------|--------------------------|-------------------|--|--|
|                                 | 2.8 (2.2, 3.7)           | 7.5 (5.7, 9.5)           |                   |  |  |
| At least one act of abuse       | 93<br>4.4 (3.5, 5.3)     | 76<br>9.5 (7.5, 11.7)    | 2.28 (1.67, 3.13) |  |  |
| <b>Controlling Behaviour</b>    |                          |                          |                   |  |  |
| Stopped seeing friends          | 227<br>8.5 (7.4, 9.6)    | 154<br>16.3 (14.0, 18.9) | 2.10 (1.69, 2.62) |  |  |
| Restricted to contact family    | 132<br>4.9 (4.1, 5.8)    | 84<br>8.9 (7.2, 10.9)    | 1.88 (1.42, 2.50) |  |  |
| Insisted to know where she is   | 459<br>17.2 (15.8, 18.7) | 186<br>19.7 (17.2, 22.4) | 1.18 (0.98, 1.43) |  |  |
| At least one act of controlling | 532<br>19.9 (18.4, 21.4) | 224<br>23.7 (21.0, 26.4) | 1.25 (1.05, 1.49) |  |  |
| A least two acts of controlling | 200<br>7.5 (6.5, 8.5)    | 133<br>14.1 (11.9, 16.5) | 2.03 (1.61, 2.56) |  |  |

1  
2  
3  
4  
5  
6  
7  
8  
9  
10  
11  
12  
13  
14  
15  
16  
17  
18  
19  
20  
21  
22  
23  
24  
25  
26  
27  
28  
29  
30  
31  
32  
33  
34  
35  
36  
37  
38  
39  
40  
41  
42  
43  
44  
45  
46

1  
2  
3 **Table 3** shows the characteristics of women who reported experiencing at least two acts of  
4 lifetime and 12-month psychological abuse.  
5  
6

7  
8 *For 12-month psychological abuse:* The adjusted odds ratio in the multivariate model shows  
9 that after controlling for sociodemographic factors, and area deprivation level, there was still  
10 a significant decrease in the reported experience of past 12-month psychological abuse from  
11 2003 to 2019 (AOR=0.64; 95%CI=0.45, 0.91).  
12  
13  
14  
15  
16

17  
18 Age, relationship status and area deprivation level were significantly associated with  
19 reporting of two or more past 12-month psychological abuse at the multivariate level. A  
20 higher proportion of women aged <45 years reported experience of past 12-month  
21 psychological abuse compared with those aged 45 years and older. A higher proportion of  
22 those who were cohabiting, or divorced compared with married reported this experience. As  
23 well, higher proportion of women who lived in the most deprived areas reported experience  
24 of this abuse type compared with women who lived in the least deprived areas.  
25  
26  
27  
28  
29  
30  
31  
32  
33  
34

35 *For lifetime psychological abuse:* No significant differences were found in reported  
36 prevalence rates of lifetime psychological abuse between the two study years, after  
37 controlling for sociodemographic factors, area deprivation level, and family support. Women  
38 aged 30 years and above were more likely to report having experienced two or more acts of  
39 lifetime psychological abuse. As well, those who were cohabiting and those who were  
40 divorced/separated were also more likely to report having experienced two/more acts of  
41 lifetime psychological abuse. The same was true for those with an independent income as  
42 they were more likely to report lifetime psychological IPV experiences compared with those  
43 without an independent income. Those who had family support were less likely to report  
44 lifetime experience of psychological abuse compared with those without.  
45  
46  
47  
48  
49  
50  
51  
52  
53  
54  
55  
56  
57  
58  
59  
60

Table 3 Characteristics of women with a past-12 months and lifetime psychological intimate partner abuse in pooled database from two cross-sectional studies in New Zealand

| Abuse type                       | Last 12 months psychological abuse |                |                         |                   | Lifetime psychological abuse |                |                   |                   |
|----------------------------------|------------------------------------|----------------|-------------------------|-------------------|------------------------------|----------------|-------------------|-------------------|
|                                  | Year                               | 2003           | 2019                    | Univariate model  | *Multivariate model          | 2003           | 2019              | Univariate model  |
| Act of abuse                     | Two/More n (%)                     | Two/More n (%) | Odds ratio (OR) (95%CI) | OR (95%CI)        | Two/more n (%)               | Two/more n (%) | OR (95%CI)        | OR (95%CI)        |
| <b>Year (ref=2003)</b>           | 207 (7.7)                          | 45 (4.8)       | 0.60 (0.43-0.83)        | 0.65 (0.46, 0.92) | 922 (34.5)                   | 331 (35.1)     | 1.03 (0.88, 1.20) | 1.05 (0.88, 1.25) |
| <b>Age group (years)</b>         |                                    |                |                         |                   |                              |                |                   |                   |
| 18-<30                           | 50 (12.5)                          | 7 (6.1)        | 1.00                    | 1.00              | 134 (33.4)                   | 33 (28.7)      | 1.00              | 1.00              |
| 30-<45                           | 104 (8.5)                          | 19 (6.0)       | 0.70 (0.50, 0.97)       | 0.87 (0.61, 1.23) | 435 (35.7)                   | 107 (33.7)     | 1.14 (0.92, 1.41) | 1.76 (1.39, 2.22) |
| 45-<55                           | 34 (5.4)                           | 12 (4.5)       | 0.43 (0.29, 0.66)       | 0.58 (0.38, 0.90) | 223 (35.0)                   | 99 (36.9)      | 1.15 (0.92, 1.45) | 1.83 (1.41, 2.37) |
| >=55                             | 19 (4.6)                           | 7 (2.9)        | 0.33 (0.20, 0.53)       | 0.46 (0.28, 0.77) | 130 (31.2)                   | 92 (38.0)      | 1.06 (0.83, 1.36) | 1.73 (1.31, 2.30) |
| <b>Education</b>                 |                                    |                |                         |                   |                              |                |                   |                   |
| Primary/secondary                | 131 (8.9)                          | 10 (3.2)       | 1.00                    | 1.00              | 540 (36.6)                   | 114 (36.4)     | 1.00              | 1.00              |
| Tertiary                         | 76 (6.4)                           | 35 (5.6)       | 0.76 (0.59, 0.99)       | 0.86 (0.65, 1.13) | 380 (23.0)                   | 215 (34.4)     | 0.85 (0.74, 0.97) | 0.89 (0.77, 1.04) |
| <b>Relationship status</b>       |                                    |                |                         |                   |                              |                |                   |                   |
| Married                          | 87 (5.2)                           | 24 (4.0)       | 1.00                    | 1.00              | 392 (32.3)                   | 158 (26.3)     | 1.00              | 1.00              |
| Cohabiting                       | 66 (11.5)                          | 12 (6.0)       | 2.19 (1.62, 2.97)       | 1.81 (1.31, 2.51) | 287 (50.0)                   | 90 (45.0)      | 3.00 (2.53, 3.55) | 3.49 (2.89, 4.21) |
| Divorced/separated/<br>broken up | 54 (15.3)                          | 8 (6.8)        | 2.98 (2.15, 4.14)       | 2.77 (1.97, 3.90) | 223 (63.2)                   | 75 (64.1)      | 5.47 (4.43, 6.75) | 5.34 (4.30, 6.63) |
| Widowed/partner died             | 0                                  | 1 (4.0)        | 0.24 (0.03, 1.71)       | 0.29 (0.04, 2.15) | 19 (32.2)                    | 8 (32.0)       | 1.49 (0.94, 2.39) | 1.33 (0.82, 2.16) |
| <b>Independent income</b>        |                                    |                |                         |                   |                              |                |                   |                   |
| Yes                              | 163 (7.7)                          | 33 (4.7)       | 0.99 (0.73, 1.35)       | 0.88 (0.64, 1.21) | 777 (36.4)                   | 252 (36.3)     | 1.44 (1.21, 1.71) | 1.23 (1.03, 1.48) |
| No                               | 44 (8.0)                           | 12 (5.0)       | 1.00                    | 1.00              | 148 (26.9)                   | 79 (32.0)      | 1.00              | 1.00              |
| <b>Deprivation level</b>         |                                    |                |                         |                   |                              |                |                   |                   |
| Least deprived                   | 51 (5.6)                           | 9 (3.3)        | 1.00                    | 1.00              | 281 (30.7)                   | 80 (29.7)      | 1.00              | 1.00              |
| Moderately deprived              | 83 (7.9)                           | 22 (5.0)       | 1.47 (1.06, 2.04)       | 1.34 (0.96, 1.87) | 367 (35.1)                   | 145 (36.9)     | 1.26 (1.07, 1.48) | 1.13 (0.95, 1.35) |
| Most deprived                    | 73 (10.3)                          | 14 (5.0)       | 1.81 (1.29, 2.55)       | 1.46 (1.02, 2.09) | 271 (38.3)                   | 106 (37.9)     | 1.41 (1.18, 1.68) | 1.10 (0.91, 1.34) |
| <b>Having family support</b>     |                                    |                |                         |                   |                              |                |                   |                   |
| Yes                              | 187 (7.8)                          | 41 (4.8)       | 1.05 (0.67, 1.64)       | -                 | 811 (33.7)                   | 288 (33.7)     | 0.69 (0.55, 0.87) | 0.72 (0.56, 0.92) |
| No                               | 20 (7.6)                           | 3 (3.7)        | 1.00                    | -                 | 109 (41.3)                   | 37 (46.2)      | 1.00              | 1.00              |

1  
2  
3 \*Odd ratios from logistic regression are calculated from the pooled database.

4 \*\* Odds ratios are adjusted for age, education, relationship status, deprivation status, independent income, and the year of the study for past 12-month  
5 psychological abuse while family support was additionally controlled for the lifetime psychological abuse.  
6  
7  
8  
9  
10  
11  
12  
13  
14  
15  
16  
17  
18  
19  
20  
21  
22  
23  
24  
25  
26  
27  
28  
29  
30  
31  
32  
33  
34  
35  
36  
37  
38  
39  
40  
41  
42  
43  
44  
45  
46

For peer review only

1  
2  
3 *Lifetime controlling behaviours:* The adjusted odds ratio shows that after controlling for  
4 sociodemographic variables, deprivation index and family support, the increase in prevalence  
5 rates of reporting two or more acts of controlling behaviours experienced remained  
6 significant (from 2003 to 2019; OR=2.5; 95%CI=1.90, 3.27). Those who were cohabiting,  
7 divorced or separated, and widowed were more likely to report having experienced  
8 controlling behaviours compared with those who were married. Those who lived in the most  
9 deprived areas were more likely to report experiencing this abuse type, compared with those  
10 who lived in the least deprived areas. Those who had some tertiary education and who had  
11 family support were less likely to report lifetime experience of controlling behaviours (**Table**  
12 **4**).

13  
14  
15  
16  
17  
18  
19  
20  
21  
22  
23  
24  
25  
26  
27 *Lifetime economic abuse:* The adjusted odds ratio shows that after controlling for  
28 sociodemographic variables and area deprivation level, the reported increase in prevalence  
29 rate of one act of economic abuse experience increased from 2003 to 2019 (OR=2.13;  
30 95%CI=1.52, 3.00). Those aged 30 years and above, and those who were cohabiting were  
31 more likely to report experiencing economic abuse compared with those who were aged  
32 below 30 years, and those who were married, respectively. Similar to the previous abuse  
33 types, those who lived in the most deprived areas were more likely to report an experience of  
34 economic abuse compared with those who lived in the least deprived areas.  
35  
36  
37  
38  
39  
40  
41  
42  
43  
44  
45  
46  
47  
48  
49  
50  
51  
52  
53  
54  
55  
56  
57  
58  
59  
60

Table 4 Characteristics of people with a lifetime economic abuse, and controlling behaviour against women aged 18-64 years and their changes in two cross-sectional studies in New Zealand

| Abuse type                       | Controlling behaviour<br>% (95%CI) |                 | *Univariate<br>model          | **Multivariate<br>model       | Economic abuse<br>% (95%CI) |                      | *Univariate<br>model I        | **Multivariate<br>model II    |
|----------------------------------|------------------------------------|-----------------|-------------------------------|-------------------------------|-----------------------------|----------------------|-------------------------------|-------------------------------|
|                                  | 2003                               | 2019            |                               |                               | 2003                        | 2019                 |                               |                               |
| Year                             |                                    |                 |                               |                               |                             |                      |                               |                               |
| Acts of abuse                    | <b>Two/more</b>                    | <b>Two/more</b> | <b>Odds Ratio<br/>(95%CI)</b> | <b>Odds Ratio<br/>(95%CI)</b> | <b>One/<br/>more</b>        | <b>One/<br/>more</b> | <b>Odds Ratio<br/>(95%CI)</b> | <b>Odds Ratio<br/>(95%CI)</b> |
|                                  | n (row%)                           | n (row%)        |                               |                               | n (row%)                    | n (row%)             |                               |                               |
| <b>Year (ref=2003)</b>           | 200 (7.5)                          | 133 (14.5)      | 2.03 (1.61, 2.56)             | 2.50 (1.90, 3.27)             | 93 (4.4)                    | 76 (9.5)             | 2.28 (1.67, 3.13)             | 2.10 (1.49, 2.94)             |
| <b>Age group</b>                 |                                    |                 |                               |                               |                             |                      |                               |                               |
| 18-<30                           | 36 (9.0)                           | 18 (15.6)       | 1.00                          | 1.00                          | 16 (5.4)                    | 7 (6.8)              | 1.00                          | 1.00                          |
| 30-<45                           | 91 (7.5)                           | 42 (13.2)       | 0.81 (0.58, 1.13)             | 1.01 (0.70, 1.45)             | 51 (5.1)                    | 24 (8.5)             | 1.02 (0.63, 1.66)             | 1.83 (1.09, 3.06)             |
| 45-<55                           | 43 (6.7)                           | 41 (15.3)       | 0.87 (0.61, 1.25)             | 0.99 (0.70, 1.48)             | 17 (3.3)                    | 25 (10.7)            | 0.97 (0.57, 1.64)             | 1.85 (1.05, 3.26)             |
| >=55                             | 30 (7.2)                           | 32 (13.1)       | 0.89 (0.60, 1.30)             | 0.77 (0.50, 1.21)             | 9 (2.9)                     | 20 (10.9)            | 1.02 (0.58, 1.80)             | 1.94 (1.05, 3.60)             |
| <b>Education</b>                 |                                    |                 |                               |                               |                             |                      |                               |                               |
| Primary/secondary                | 135 (9.1)                          | 54 (17.1)       | 1.00                          | 1.00                          | 57 (5.0)                    | 28 (10.9)            | 1.00                          | 1.00                          |
| Tertiary                         | 65 (5.5)                           | 79 (12.6)       | 0.73 (0.58, 0.92)             | 0.74 (0.57, 0.96)             | 35 (3.6)                    | 47 (8.7)             | 0.89 (0.65, 1.22)             | 0.83 (0.58, 1.20)             |
| p-value                          | <0.001                             | 0.06            |                               |                               | 0.13                        | 0.31                 |                               |                               |
| <b>Relationship status</b>       |                                    |                 |                               |                               |                             |                      |                               |                               |
| Married                          | 45 (2.7)                           | 53 (8.8)        | 1.00                          | 1.00                          | 55 (3.3)                    | 42 (7.0)             | 1.00                          | 1.00                          |
| Cohabiting                       | 37 (6.4)                           | 40 (19.9)       | 2.46 (1.80, 3.36)             | 2.22 (1.59, 3.10)             | 38 (8.7)                    | 34 (16.9)            | 2.87 (2.08, 3.94)             | 2.95 (2.08, 4.18)             |
| Divorced/separated/<br>broken up | 108 (30.6)                         | 36 (30.8)       | 9.86 (7.44,<br>13.07)         | 9.16 (6.81,<br>12.30)         | -                           | -                    |                               | -                             |
| Widowed/partner died             | 10 (16.7)                          | 4 (16.0)        | 4.40 (2.40, 8.08)             | 4.17 (2.19, 7.93)             | -                           | -                    |                               | -                             |
| <b>Independent income</b>        |                                    |                 |                               |                               |                             |                      |                               |                               |
| Yes                              | 169 (7.9)                          | 102 (14.7)      | 1.28 (0.96, 1.72)             | 1.25 (0.91, 1.73)             | 67 (4.1)                    | 56 (9.4)             | 0.84 (0.59, 1.20)             | 0.91 (0.65, 1.28)             |
| No                               | 30 (5.4)                           | 31 (12.5)       | 1.00                          | 1.00                          | 26 (5.2)                    | 20 (9.8)             | 1.00                          | 1.00                          |
| <b>Deprivation level</b>         |                                    |                 |                               |                               |                             |                      |                               |                               |
| Least deprived                   | 36 (3.9)                           | 29 (10.7)       | 1.00                          | 1.00                          | 19 (4.4)                    | 20 (8.4)             | 1.00                          | 1.00                          |
| Moderately deprived              | 76 (7.3)                           | 41 (10.4)       | 1.52 (1.11, 2.09)             | 1.19 (0.85, 1.65)             | 31 (3.7)                    | 26 (7.7)             | 1.30 (0.85, 1.97)             | 1.20 (0.79, 1.84)             |
| Most deprived                    | 87 (12.3)                          | 63 (22.4)       | 3.08 (2.27, 4.17)             | 2.01 (1.44, 2.80)             | 43 (8.5)                    | 30 (13.3)            | 2.81 (1.88, 4.19)             | 2.32 (1.53, 3.53)             |
| <b>Having family support</b>     |                                    |                 |                               |                               |                             |                      |                               |                               |
| Yes                              | 165 (6.9)                          | 113 (13.2)      | 0.54 (0.39, 0.74)             | 0.65 (0.45, 0.93)             | 84 (4.4)                    | 65 (8.8)             | 0.79 (0.48, 1.31)             | -                             |

| Abuse type    | Controlling behaviour<br>% (95%CI) |           | *Univariate<br>model  | **Multivariate<br>model | Economic abuse<br>% (95%CI) |              | *Univariate<br>model I | **Multivariate<br>model II |
|---------------|------------------------------------|-----------|-----------------------|-------------------------|-----------------------------|--------------|------------------------|----------------------------|
|               | 2003                               | 2019      |                       |                         | 2003                        | 2019         |                        |                            |
| Year          |                                    |           |                       |                         |                             |              |                        |                            |
| Acts of abuse | Two/more                           | Two/more  | Odds Ratio<br>(95%CI) | Odds Ratio<br>(95%CI)   | One/<br>more                | One/<br>more | Odds Ratio<br>(95%CI)  | Odds Ratio<br>(95%CI)      |
|               | n (row%)                           | n (row%)  |                       |                         | n (row%)                    | n (row%)     |                        |                            |
| No            | 35 (13.3)                          | 16 (19.7) | 1.00                  | 1.00                    | 8 (4.0)                     | 10 (17.2)    | 1.00                   | -                          |

\* Odd ratios from logistic regression are calculated from the pooled database.

\*\* Odds ratios are adjusted for age, education, relationship status, deprivation status, independent income, having family support, and the year of the study for controlling behaviours. Family support was not included in the multivariate analysis for the economic abuse.

For peer review only

1  
2  
3  
4  
5  
6  
7  
8  
9  
10  
11  
12  
13  
14  
15  
16  
17  
18  
19  
20  
21  
22  
23  
24  
25  
26  
27  
28  
29  
30  
31  
32  
33  
34  
35  
36  
37  
38  
39  
40  
41  
42  
43  
44  
45  
46

1  
2  
3 There was a significant interaction between education status and the study year for the  
4 reporting of at least two or more acts of past 12-month psychological abuse. There was a  
5 significantly lower proportion of women with primary or secondary education who reported  
6 past 12-month psychological abuse between 2003 (8.9%) and (3.2%) 2019. There was no  
7 significant difference in reported prevalence rates for women with some tertiary education  
8 between 2003 (6.4%) and 2019 (5.4%) (**Table 5**; p-value for interaction=0.02).  
9  
10  
11  
12  
13  
14  
15  
16

17 Furthermore, there was a significant interaction between relationship status and the study  
18 year for reporting of at least two or more acts of controlling behaviours. A higher proportion  
19 of women who were married reported experience of controlling behaviours in 2019 (8.8%)  
20 compared with 2003 (2.7%), as did women who were cohabiting (19.9% in 2019, and 6.4%  
21 in 2003). Although the highest prevalence rates for controlling behaviours were reported by  
22 women who were divorced, broken up or separated, the rates were not significantly different  
23 between the two survey years (**Table 5**; p-value for interaction<0.001).  
24  
25  
26  
27  
28  
29  
30  
31  
32  
33

34 No other interactions were significant for reporting of past 12-month psychological abuse, or  
35 lifetime controlling behaviours.  
36  
37  
38  
39  
40  
41  
42  
43  
44  
45  
46  
47  
48  
49  
50  
51  
52  
53  
54  
55  
56  
57  
58  
59  
60



**Table 5 Modification effect of education on reporting past 12-month psychological abuse, and relationship status on lifetime controlling behaviours, by the study year**

| Variable         | Level                        | Past 12-month psychological abuse (≥2 acts) |              | *Adjusted OR (95%CI) | P value for interaction test | Lifetime controlling behaviours (≥2 acts) |              | **Adjusted OR (95%CI) | P value for interaction test |
|------------------|------------------------------|---------------------------------------------|--------------|----------------------|------------------------------|-------------------------------------------|--------------|-----------------------|------------------------------|
|                  |                              | Year 1 N (%)                                | Year 2 N (%) |                      |                              | Year 1 N (%)                              | Year 2 N (%) |                       |                              |
| Education status | Primary/secondary            | 131 (8.88)                                  | 10 (3.19)    | 0.35 (0.18, 0.68)    | 0.02                         | -                                         | -            | -                     | -                            |
|                  | High education               | 76 (6.40)                                   | 35 (5.60)    | 0.89 (0.58, 1.35)    |                              | -                                         | -            | -                     | -                            |
| Marital status   | Married                      | -                                           | -            | -                    |                              | 45 (2.7)                                  | 53 (8.8)     | 3.54 (2.90, 5.47)     | <0.001                       |
|                  | Cohabiting                   | -                                           | -            | -                    |                              | 37 (6.4)                                  | 40 (19.9)    | 4.67 (2.74, 7.95)     |                              |
|                  | Divorced/separated/broken up | -                                           | -            | -                    |                              | 108 (30.6)                                | 36 (30.8)    | 0.94 (0.56, 1.58)     |                              |
|                  | Widowed/ partner died        | -                                           | -            | -                    |                              | 10 (16.7)                                 | 4 (16.0)     | 1.33 (0.34, 5.13)     |                              |

\*Controlled for age, marital status, independent income, and deprivation level

\*\*Controlled for age, education, independent income, and deprivation level

ew only

## DISCUSSION

This study compared the reported prevalence rates for past 12-month and lifetime psychological, economic abuse, and controlling behaviours from an intimate partner experienced by women between two population-based studies conducted in 2003 and 2019. There was no difference in reported lifetime psychological abuse between the two years, with just over a third of women (35%) in both surveys reporting having experienced at least two acts of psychological IPV in their lifetime, however, the proportion of women who reported past 12-month psychological abuse decreased significantly. The lifetime prevalence rate for reporting controlling behaviours doubled from 7.5% in 2003 to 14.5% in 2019. The same was true for the lifetime rate of economic abuse (4.4% in 2003 to 9.5% in 2019).

Overall, these findings are reflective of the results of some international studies,[7,36–38] but not others.[9,39] Comparisons are difficult as few countries have carried out repeat surveys and there are often differences in the measurement tools, and data collection strategies used.

In the current study, the substantive reduction in 12-month psychological abuse between the two study years was reported by women with primary or secondary education. A Swedish cross-sectional study also found a decrease in odds of reporting psychological abuse among those with lower educational status.[37] It is possible that the messaging from national family violence campaigns such as *It's Not Ok* contributed to this decrease.[40]

Importantly, having family support available in an emergency was associated with decreased risk of experiencing lifetime controlling behaviours and psychological abuse in this study.

Other research has also noted the importance of social support as a protective factor against abuse.[27,37] This reinforces the need to take a whole of family approach to addressing violence experience.

1  
2  
3 The finding of an increase in reports of economic abuse among women aged 30 years and  
4 above could be reflective of a greater likelihood of them having joint bank accounts or shared  
5 property, business, or other combined finances with their partners, compared with their  
6 younger peers. Additionally, greater likelihood of reporting economic abuse could be due to  
7 women's greater awareness about the abusive financial behaviours they were experiencing, or  
8 as a result of increased likelihood of being employed.[13] However, economic abuse has not  
9 been the topic of prevention campaigns in New Zealand.

10  
11  
12 Finally, the last but not least important association to highlight is the negative impact of  
13 living in the most deprived areas which increased odds of reporting lifetime controlling  
14 behaviour and economic abuse. This was consistent with previous research[27] and highlights  
15 the continuing importance of implementing strategies to increase equity.

16  
17  
18 **Strengths and future study directions** This study included a large sample of women from  
19 two cross sectional studies conducted in 2003 and 2019 on intimate partner violence. It is the  
20 first time that two survey samples with matching methods compare three seldomly reported  
21 forms of IPV. Future qualitative and quantitative research is warranted to determine if the  
22 considerable increase reported in economic abuse and controlling behaviour represents a true  
23 change or the result of increased awareness.

24  
25  
26 **Limitations** The results are based on population samples from 2003 and 2019 with response  
27 rates of about 64%. Given that women who experience severe forms of violence are unlikely  
28 to feel safe to participate in surveys such as that conducted, it is likely that the reported rates  
29 are an underestimate of the true prevalence. In addition, it is possible that changes between  
30 the two study years could have originated from other societal, environmental factors that  
31 were not included in these analyses.

1  
2  
3 In summary, the decrease in the reported prevalence of past 12-month psychological abuse is  
4 positive and consistent with the decrease in reported 12-month prevalence of physical IPV  
5 (Fanslow, *et al.*, *BMJ Open*). Reductions in 12-month prevalence rates suggest that women  
6 are more easily able to recognise unsafe relationships, or remove themselves from the violent  
7 behaviour.  
8  
9  
10  
11  
12  
13  
14

15 There have been a series of strategies and campaigns between the two years, with a focus on  
16 sexual and physical IPV which may have contribute to a decline in the past 12-month  
17 psychological abuse due to raised awareness among women.[41] However, the increase in the  
18 prevalence of lifetime controlling behaviour and economic abuse could also signal that there  
19 is a change in abusive tactics which are being used by partners who use violence.[42] As  
20 controlling behaviours and economic abuse are seldom prosecuted or indeed recognized, the  
21 shift in tactics could be advantageous to those who use violence as they carry less risk of  
22 penalty.[23,42]  
23  
24  
25  
26  
27  
28  
29  
30  
31  
32  
33

34 The increase in reported prevalence of economic abuse and controlling behaviours shows that  
35 these experiences should be measured separately and not conflated under the umbrella of  
36 psychological abuse. This also has relevance from a policy and practice perspective, as it  
37 indicates that controlling behaviours and economic abuse need their own recognition and  
38 response. Currently, in New Zealand law, they are considered as forms of psychological  
39 abuse.[43] It has been suggested that a legislative amendment to the Family Violence Act is  
40 needed to recognize economic abuse separately from psychological abuse,[44] however any  
41 legislative change would need to be supported by procedural changes that enables  
42 prosecution of this form of abuse.[44] Further consideration is required to understand how to  
43 effectively prevent violence experience, including impacting on masculine norms.  
44  
45  
46  
47  
48  
49  
50  
51  
52  
53  
54  
55  
56  
57  
58  
59  
60

1  
2  
3 Given the limited research available on the prevalence and consequences of controlling  
4  
5 behaviour and economic abuse, the sharp increases in these behaviours noted in the present  
6  
7 study suggest that further work is needed to understand the consequences of these behaviours  
8  
9 and to develop appropriate prevention and mitigation strategies.  
10  
11  
12

### 13 **Acknowledgments**

14  
15 We gratefully acknowledge participants, the interviewers, and the study project team, led by  
16 Patricia Meagher-Lundberg. We also acknowledge the representatives from the Ministry of  
17 Justice, the Accident Compensation Corporation, the New Zealand Police, and the Ministry  
18 of Education, who were part of the Governance Group for Family and Sexual Violence at the  
19 inception of the study. The two cross-sectional studies from which this study used data are  
20 based on the WHO Violence Against Women Instrument as developed for use in the WHO  
21 Multi-Country Study on Women's Health and Domestic Violence and has been adapted from  
22 the version used in Asia and the Pacific by kNOwVAWdata Version 12.03). It adheres to the  
23 WHO ethical guidelines for the conduct of violence against women research  
24  
25  
26  
27  
28

29 **Contributors:** Janet Fanslow (JF), Pauline Gulliver (PG), contributed to the conception and  
30 design of the study. Tracey McIntosh (TM) contributed to the application for funding of 2019  
31 study. Ladan Hashemi (LH) managed the data cleaning. LH and Zarintaj Malihi (ZM)  
32 conducted the analyses, ZM and JF interpreted the data, drafted the article and revised it. All  
33 authors contributed to the manuscript and approved the final version.  
34

35 **Ethics approval** was granted by the University of Auckland Human Participants Ethics  
36 Committee in 2003 (Ref number: 2002/199) and 2019 (Reference number 2015/ 018244).  
37  
38

39 **Data availability statement** Data are unavailable due to the confidentiality and sensitivity of  
40 the data and Māori data sovereignty.  
41

42 **Competing interests** hereby we confirm that all authors read and understood BMJ policy on  
43 declaration of interests and have completed the ICMJE uniform disclosure form at  
44 [http://www.icmje.org/coi\\_disclosure.pdf](http://www.icmje.org/coi_disclosure.pdf) and declare that we received: no support from any  
45 organisation for the submitted work (or describe if any); no financial relationships with any  
46 organisations that might have an interest in the submitted work in the previous three years.  
47  
48  
49  
50  
51  
52  
53  
54  
55  
56  
57  
58  
59  
60

## REFERENCES

- 1 Gibbs A, Dunkle K, Jewkes R. Emotional and economic intimate partner violence as key drivers of depression and suicidal ideation: A cross-sectional study among young women in informal settlements in South Africa. *PLoS One* 2018;**13**. doi:10.1371/journal.pone.0194885
- 2 Coker AL, Davis KE, Arias I, *et al*. Physical and mental health effects of intimate partner violence for men and women. *Am J Prev Med* 2002;**23**:260–8. doi:10.1016/S0749-3797(02)00514-7
- 3 Garcia-Moreno C, Jansen HA, Ellsberg M, *et al*. Prevalence of intimate partner violence: findings from the WHO multi-country study on women’s health and domestic violence. *Lancet* 2006;**368**:1260–9. doi:10.1016/S0140-6736(06)69523-8
- 4 Adams AE, Sullivan CM, Bybee D, *et al*. Development of the Scale of Economic Abuse. *Violence Against Women* 2008;**14**:563–88. doi:10.1177/1077801208315529
- 5 Krantz G, Vung ND. The role of controlling behaviour in intimate partner violence and its health effects: A population based study from rural Vietnam. *BMC Public Health* 2009;**9**:1–10. doi:10.1186/1471-2458-9-143
- 6 Smith, K; Zhang, X ; Basile KC, Merrick, M.T; Wang, T; Kresnow, M.J; Chen J. The National Intimate Partner and Sexual Violence Survey: 2015 Data Brief — Updated Release. Atlanta, Georgia: 2018. <https://www.cdc.gov/violenceprevention/pdf/2015data-brief508.pdf> (accessed 19 Apr 2020).
- 7 European Union Agency for Fundamental Rights (EUAFR). Violence against women: an EU-wide survey: Main results. Vienna: 2015. doi:10.2811/62230
- 8 Fanslow JL, Robinson EM. Sticks, Stones, or Words? Counting the Prevalence of Different Types of Intimate Partner Violence Reported by New Zealand Women. *J Aggress Maltreat Trauma* 2011;**20**:741–59. doi:10.1080/10926771.2011.608221
- 9 Australian Institute of Health and Welfare. *Family, domestic and sexual violence in Australia: continuing the national story 2019*. 2019. [www.aihw.gov.au](http://www.aihw.gov.au)
- 10 Family Violence Death Review Committee. Sixth report | Te Pūrongo tuaono Men who use violence | Ngā tāne ka whakamahi i te whakarekerekere. 2020.
- 11 Jewkes R. Emotional abuse: A neglected dimension of partner violence. *Lancet*. 2010;**376**:851–2. doi:10.1016/S0140-6736(10)61079-3
- 12 Smith PH, Thornton GE, DeVellis R, *et al*. A population-based study of the prevalence and distinctiveness of battering, physical assault, and sexual assault in intimate relationships. *Violence Against Women* 2002;**8**:1208–32. doi:10.1177/107780102320562691
- 13 Kutin J, Russell R, Reid M. Economic abuse between intimate partners in Australia: prevalence, health status, disability and financial stress. *Aust N Z J Public Health* 2017;**41**:269–74. doi:10.1111/1753-6405.12651
- 14 Karakurt G, Silver KE. Emotional abuse in intimate relationships: The role of gender and age. *Violence Vict* 2013;**28**:804–21.

- 1  
2  
3 15 Kapiga S, Harvey S, Muhammad AK, *et al.* Prevalence of intimate partner violence  
4 and abuse and associated factors among women enrolled into a cluster randomised trial  
5 in northwestern Tanzania. *BMC Public Health* 2017;**17**. doi:10.1186/s12889-017-  
6 4119-9  
7  
8 16 Kwaramba T, Ye JJ, Elahi C, *et al.* Lifetime prevalence of intimate partner violence  
9 against women in an urban Brazilian city: A cross-sectional survey. *PLoS One*  
10 2019;**14**:e0224204. doi:10.1371/journal.pone.0224204  
11  
12 17 Mendonça MFS de, Ludermir AB. Intimate partner violence and incidence of common  
13 mental disorder. *Rev Saude Publica* 2017;**51**:32. doi:10.1590/S1518-  
14 8787.2017051006912  
15  
16 18 Krug EG, Mercy JA, Dahlberg LL, *et al.* The world report on violence and health.  
17 *Lancet* 2002;**360**:1083–8. doi:10.1016/S0140-6736(02)11133-0  
18  
19 19 Ansara DL, Hindin MJ. Exploring gender differences in the patterns of intimate  
20 partner violence in Canada: A latent class approach. *J Epidemiol Community Health*  
21 2010;**64**:849–54. doi:10.1136/jech.2009.095208  
22  
23 20 Lövestad S, Löve J, Vaez M, *et al.* Prevalence of intimate partner violence and its  
24 association with symptoms of depression; A cross-sectional study based on a female  
25 population sample in Sweden. *BMC Public Health* 2017;**17**:1–11. doi:10.1186/s12889-  
26 017-4222-y  
27  
28 21 Beck JG, McNiff J, Clapp JD, *et al.* Exploring Negative Emotion in Women  
29 Experiencing Intimate Partner Violence: Shame, Guilt, and PTSD. *Behav Ther*  
30 2011;**42**:740–50. doi:10.1016/j.beth.2011.04.001  
31  
32 22 Stylianou AM. Economic Abuse Within Intimate Partner Violence: A Review of the  
33 Literature. *Violence Vict* 2018;**33**:3–22. doi:10.1891/0886-6708.33.1.3  
34  
35 23 Gondolf EW, Alex D, Kimmel CM. Nonphysical Abuse Among Batterer Program  
36 Participants. 2002.  
37  
38 24 Graham-Kevan N, Archer J. Does Controlling Behavior Predict Physical Aggression  
39 and Violence to Partners? *J Fam Viol* 2008;**23**:539–48. doi:10.1007/s10896-008-9162-  
40 y  
41  
42 25 O’Leary KD. Psychological abuse: A variable deserving critical attention in domestic  
43 violence. *Violence Vict* 1999;**14**:3–23. doi:10.1891/0886-6708.14.1.3  
44  
45 26 Schumacher JA, Leonard KE. Husbands’ and wives’ marital adjustment, verbal  
46 aggression, and physical aggression as longitudinal predictors of physical aggression  
47 in early marriage. *J Consult Clin Psychol* 2005;**73**:28–37. doi:10.1037/0022-  
48 006X.73.1.28  
49  
50 27 Lövestad S, Krantz G. Men’s and women’s exposure and perpetration of partner  
51 violence: An epidemiological study from Sweden. *BMC Public Health* 2012;**12**:945.  
52 doi:10.1186/1471-2458-12-945  
53  
54 28 Huang C-C, Postmus JL, Vikse JH, *et al.* Economic abuse, physical violence, and  
55 union formation. *Child Youth Serv Rev* 2013;**35**:780–6.  
56 doi:10.1016/j.childyouth.2013.01.020  
57  
58 29 Stickley A, Carlson P. Factors associated with non-lethal violent victimization in  
59  
60

- 1  
2  
3 Sweden in 2004-2007. *Scand J Public Health* 2010;**38**:404–10.  
4 doi:10.1177/1403494810364560  
5
- 6 30 Australian Institute of Health and Welfare. Family, domestic and sexual violence in  
7 Australia 2018. Australian Institute of Health and Welfare 2018.  
8
- 9 31 Fanslow J, ; Robinson E. Violence against women in New Zealand: prevalence and  
10 health consequences. *N Z Med J* 2004;**117**:1–12.  
11
- 12 32 Clearinghouse NZFV. Timeline | New Zealand Family Violence Clearinghouse.  
13 <https://nzfvc.org.nz/?q=timeline/2010/2100> (accessed 26 Aug 2020).  
14
- 15 33 Fenrich J, Contesse J. 'It's not OK': New Zealand's efforts to eliminate violence  
16 against women. Leitner Center for International Law and Justice 2009.  
17
- 18 34 Garcia-Moreno C, Jansen HA, Ellsberg M, *et al*. Prevalence of intimate partner  
19 violence: findings from the WHO multi-country study on women's health and  
20 domestic violence. *Lancet* 2006;**368**:1260–9. doi:10.1016/S0140-6736(06)69523-8  
21
- 22 35 Exeter DJ, Zhao J, Crengle S, *et al*. The New Zealand Indices of Multiple Deprivation  
23 (IMD): A new suite of indicators for social and health research in Aotearoa, New  
24 Zealand. *PLoS One* 2017;**12**:e0181260. doi:10.1371/journal.pone.0181260  
25
- 26 36 Nerøien AI, Schei B. Partner violence and health: Results from the first national study  
27 on violence against women in Norway. *Scand J Public Health* 2008;**36**:161–8.  
28 doi:10.1177/1403494807085188  
29
- 30 37 Nybergh L, Taft C, Enander V, *et al*. Self-reported exposure to intimate partner  
31 violence among women and men in Sweden: Results from a population-based survey.  
32 *BMC Public Health* 2013;**13**:845. doi:10.1186/1471-2458-13-845  
33
- 34 38 Burczycka M. Family violence in Canada: A statistical profile, 2014. 2016. doi:85-  
35 224-X  
36
- 37 39 Wong WW, Ortiz CL, Lathan D, *et al*. Sleep duration of underserved minority children  
38 in a cross-sectional study. *BMC Public Health* 2013;**13**:648.  
39 doi:<https://dx.doi.org/10.1186/1471-2458-13-648>  
40
- 41 40 Roguski M. 'IT'S NOT OK' CAMPAIGN COMMUNITY EVALUATION  
42 PROJECT. 2015. [http://www.areyouok.org.nz/assets/RUOK-Uploads/f-MDS17572-](http://www.areyouok.org.nz/assets/RUOK-Uploads/f-MDS17572-Evaluation-Doc-1a.pdf)  
43 [Evaluation-Doc-1a.pdf](http://www.areyouok.org.nz/assets/RUOK-Uploads/f-MDS17572-Evaluation-Doc-1a.pdf) (accessed 15 Sep 2020).  
44
- 45 41 Cismaru M, Lavack AM. Campaigns targeting perpetrators of intimate partner  
46 violence. *Trauma, Violence, Abus* 2011;**12**:183–97. doi:10.1177/1524838011416376  
47
- 48 42 Rothman EF, Butchart A, Cerdá M. Intervening with Perpetrators of Intimate Partner  
49 Violence: A Global Perspective. Geneva: 2003. [www.inis.ie](http://www.inis.ie) (accessed 28 Aug 2020).  
50
- 51 43 Domestic Violence Amendment Act 2013 No 77 (as at 01 July 2019), Public Act –  
52 New Zealand Legislation. New Zeal. Gov.  
53 2019.[http://www.legislation.govt.nz/act/public/2013/0077/latest/whole.html#DLM561](http://www.legislation.govt.nz/act/public/2013/0077/latest/whole.html#DLM5615634)  
54 [5634](http://www.legislation.govt.nz/act/public/2013/0077/latest/whole.html#DLM5615634): (accessed 27 Aug 2020).  
55
- 56 44 Milne S, Maury S, Gulliver Co-Author P. *Economic Abuse in New Zealand: Towards*  
57 *an understanding and response*. Christchurch: : Good Shepherd Australia New  
58 Zealand 2018. [www.goodshep.org.au](http://www.goodshep.org.au) (accessed 22 Apr 2020).  
59  
60



1  
2  
3 **Figure legend:**  
4

5 **Figure 1** Flow diagram of included female participants in 2003 and 2019 population sample in  
6 New Zealand  
7  
8  
9  
10  
11  
12  
13  
14  
15  
16  
17  
18  
19  
20  
21  
22  
23  
24  
25  
26  
27  
28  
29  
30  
31  
32  
33  
34  
35  
36  
37  
38  
39  
40  
41  
42  
43  
44  
45  
46  
47  
48  
49  
50  
51  
52  
53  
54  
55  
56  
57  
58  
59  
60

For peer review only

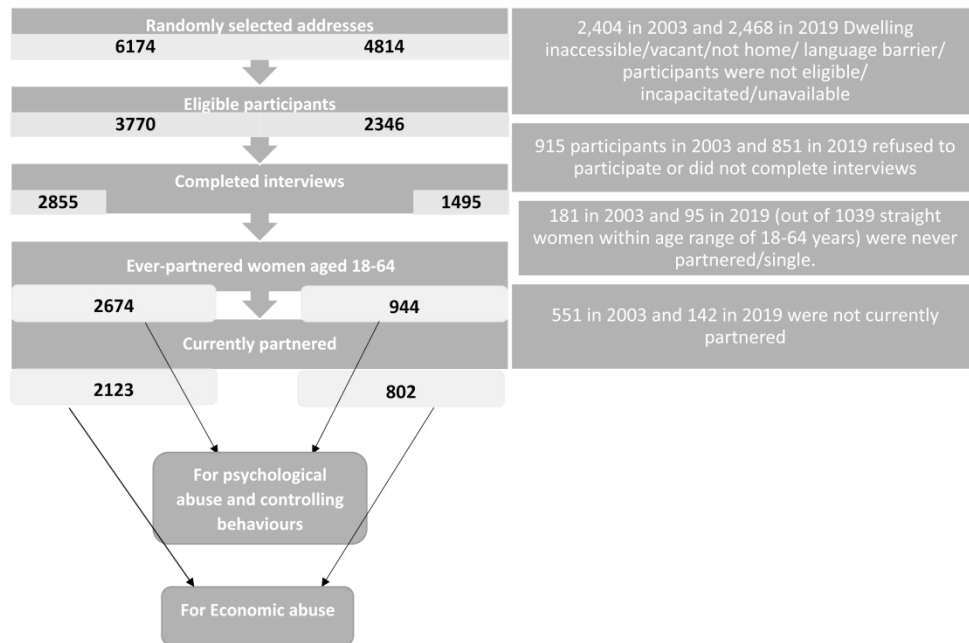

Figure 1 Flow diagram of included female participants in 2003 and 2019 population sample in New Zealand

245x164mm (300 x 300 DPI)

**Supplementary Table 1 Measurements of psychological, economic abuse and controlling behavior in 2003 and 2019**

|                                                                  |                               | 2003                                                                                                                                                | 2019                                                                                                                                 |
|------------------------------------------------------------------|-------------------------------|-----------------------------------------------------------------------------------------------------------------------------------------------------|--------------------------------------------------------------------------------------------------------------------------------------|
| Psychological abuse                                              | Insulted                      | Has your current husband / partner, or any other partner ever....<br>Insulted you or made you feel bad about yourself?                              | Has your current or any previous partner ever done any of the following things?<br>Insulted you or made you feel bad about yourself? |
|                                                                  | Humiliated                    | Belittled or humiliated you in front of other people?                                                                                               | Said or did something that made you feel humiliated in front of other people?                                                        |
|                                                                  | Intimidated                   | Done things to scare or intimidate you on purpose (e.g. by the way he looked at you, by yelling and smashing things)?                               | Did things that made you feel scared or intimidated?                                                                                 |
|                                                                  | Threatened                    | Threatened to hurt you or someone you care about?                                                                                                   | Threatened to harm you or someone you care about?                                                                                    |
| Economic abuse (Currently married / currently living with a man) | Taken money                   | Has your husband / partner ever taken your earnings or savings from you against your will?                                                          | Has any partner ever taken your earnings or savings from you against your will?                                                      |
|                                                                  | Refused to give money         | Does your husband /partner ever refuse to give you money for household expenses, even when he has money for other things?                           | Has any partner ever refused to give you money for household expenses, even when they have money for other things?                   |
| Controlling behavior                                             | Stopped seeing friends        | Thinking about your (current or most recent) husband, would you say it is generally true that he:<br>a) tries to keep you from seeing your friends? | Has your current, or any previous partner ever stopped you from seeing your friends?                                                 |
|                                                                  | Restricted to contact family  | Thinking about your (current or most recent) husband, tries to restrict contact with your family of birth?                                          | Has your current, or any previous partner ever Restricted contact with your family?                                                  |
|                                                                  | Insisted to know where she is | Thinking about your (current or most recent) husband, insists on knowing where you are at all times?                                                | Has your current, or any previous partner ever Insisted on knowing where you are in a way that made you feel controlled or afraid?   |

**Supplementary Table 2 Definitions of economic status and other confounding/ explanatory variables**

| Variable                            | Questions                                                                                                                                                                                                                                                                                                                                                                                                                        |
|-------------------------------------|----------------------------------------------------------------------------------------------------------------------------------------------------------------------------------------------------------------------------------------------------------------------------------------------------------------------------------------------------------------------------------------------------------------------------------|
| <b>Independent source of income</b> | Incomes from wages or investments, retirement income. It is a binary variable with Yes, and No answers.                                                                                                                                                                                                                                                                                                                          |
| <b>Deprivation level</b>            | Taken from NZ index of multiple deprivation (IMD) <sup>37</sup> a combination of routinely collected data from government departments and census data in seven domains (i.e. employment, income, crime, housing, health, education, and access to services) to develop a measure of deprivation at the neighborhood level. We classified participants as living in least deprived, moderately deprived, and most deprived areas. |
| <b>Support from family/ friends</b> | When you need help or have a problem, can you usually count on members of your family for support? Binary answer: Yes, No.                                                                                                                                                                                                                                                                                                       |

**STROBE 2007 (v4) Statement—Checklist of items that should be included in reports of *cross-sectional studies***

| Section/Topic                | Item # | Recommendation                                                                                                                                                                       | Reported on page #                |
|------------------------------|--------|--------------------------------------------------------------------------------------------------------------------------------------------------------------------------------------|-----------------------------------|
| <b>Title and abstract</b>    | 1      | (a) Indicate the study's design with a commonly used term in the title or the abstract                                                                                               | 1-2                               |
|                              |        | (b) Provide in the abstract an informative and balanced summary of what was done and what was found                                                                                  | 1-2                               |
| <b>Introduction</b>          |        |                                                                                                                                                                                      |                                   |
| Background/rationale         | 2      | Explain the scientific background and rationale for the investigation being reported                                                                                                 | 3-4                               |
| Objectives                   | 3      | State specific objectives, including any prespecified hypotheses                                                                                                                     | 4                                 |
| <b>Methods</b>               |        |                                                                                                                                                                                      |                                   |
| Study design                 | 4      | Present key elements of study design early in the paper                                                                                                                              | 1 and 5                           |
| Setting                      | 5      | Describe the setting, locations, and relevant dates, including periods of recruitment, exposure, follow-up, and data collection                                                      | 5                                 |
| Participants                 | 6      | (a) Give the eligibility criteria, and the sources and methods of selection of participants                                                                                          | 5                                 |
| Variables                    | 7      | Clearly define all outcomes, exposures, predictors, potential confounders, and effect modifiers. Give diagnostic criteria, if applicable                                             | 6-7                               |
| Data sources/<br>measurement | 8*     | For each variable of interest, give sources of data and details of methods of assessment (measurement). Describe comparability of assessment methods if there is more than one group | 5-7, supplementary tables 1 and 2 |
| Bias                         | 9      | Describe any efforts to address potential sources of bias                                                                                                                            | 6                                 |
| Study size                   | 10     | Explain how the study size was arrived at                                                                                                                                            | 6                                 |
| Quantitative variables       | 11     | Explain how quantitative variables were handled in the analyses. If applicable, describe which groupings were chosen and why                                                         | 6-7                               |
| Statistical methods          | 12     | (a) Describe all statistical methods, including those used to control for confounding                                                                                                | 7                                 |
|                              |        | (b) Describe any methods used to examine subgroups and interactions                                                                                                                  | 7                                 |
|                              |        | (c) Explain how missing data were addressed                                                                                                                                          | 7                                 |
|                              |        | (d) If applicable, describe analytical methods taking account of sampling strategy                                                                                                   | NA                                |
|                              |        | (e) Describe any sensitivity analyses                                                                                                                                                | NA                                |
| <b>Results</b>               |        |                                                                                                                                                                                      |                                   |

|                          |     |                                                                                                                                                                                                              |                            |
|--------------------------|-----|--------------------------------------------------------------------------------------------------------------------------------------------------------------------------------------------------------------|----------------------------|
| Participants             | 13* | (a) Report numbers of individuals at each stage of study—eg numbers potentially eligible, examined for eligibility, confirmed eligible, included in the study, completing follow-up, and analysed            | Page 6, Figure 1           |
|                          |     | (b) Give reasons for non-participation at each stage                                                                                                                                                         | Figure 1                   |
|                          |     | (c) Consider use of a flow diagram                                                                                                                                                                           | Figure 1                   |
| Descriptive data         | 14* | (a) Give characteristics of study participants (eg demographic, clinical, social) and information on exposures and potential confounders                                                                     | Page 6 and page 9, Table 1 |
|                          |     | (b) Indicate number of participants with missing data for each variable of interest                                                                                                                          | Figure 1                   |
| Outcome data             | 15* | Report numbers of outcome events or summary measures                                                                                                                                                         | Table 2                    |
| Main results             | 16  | (a) Give unadjusted estimates and, if applicable, confounder-adjusted estimates and their precision (eg, 95% confidence interval). Make clear which confounders were adjusted for and why they were included | Table 3 and table 4        |
|                          |     | (b) Report category boundaries when continuous variables were categorized                                                                                                                                    | NA                         |
|                          |     | (c) If relevant, consider translating estimates of relative risk into absolute risk for a meaningful time period                                                                                             | NA                         |
| Other analyses           | 17  | Report other analyses done—eg analyses of subgroups and interactions, and sensitivity analyses                                                                                                               | Table 5                    |
| <b>Discussion</b>        |     |                                                                                                                                                                                                              |                            |
| Key results              | 18  | Summarise key results with reference to study objectives                                                                                                                                                     | 21                         |
| Limitations              | 19  | Discuss limitations of the study, taking into account sources of potential bias or imprecision. Discuss both direction and magnitude of any potential bias                                                   | 22                         |
| Interpretation           | 20  | Give a cautious overall interpretation of results considering objectives, limitations, multiplicity of analyses, results from similar studies, and other relevant evidence                                   | 23                         |
| Generalisability         | 21  | Discuss the generalisability (external validity) of the study results                                                                                                                                        | 23                         |
| <b>Other information</b> |     |                                                                                                                                                                                                              |                            |
| Funding                  | 22  | Give the source of funding and the role of the funders for the present study and, if applicable, for the original study on which the present article is based                                                | 2                          |

\*Give information separately for cases and controls in case-control studies and, if applicable, for exposed and unexposed groups in cohort and cross-sectional studies.

**Note:** An Explanation and Elaboration article discusses each checklist item and gives methodological background and published examples of transparent reporting. The STROBE checklist is best used in conjunction with this article (freely available on the Web sites of PLoS Medicine at <http://www.plosmedicine.org/>, Annals of Internal Medicine at <http://www.annals.org/>, and Epidemiology at <http://www.epidem.com/>). Information on the STROBE Initiative is available at [www.strobe-statement.org](http://www.strobe-statement.org).

# BMJ Open

## Change in prevalence of psychological and economic abuse, and controlling behaviors against women by an intimate partner in two cross-sectional studies in New Zealand, 2003-2019

|                                 |                                                                                                                                                                                                                                                                                                                                                                                                                                                                                                                                                                                                         |
|---------------------------------|---------------------------------------------------------------------------------------------------------------------------------------------------------------------------------------------------------------------------------------------------------------------------------------------------------------------------------------------------------------------------------------------------------------------------------------------------------------------------------------------------------------------------------------------------------------------------------------------------------|
| Journal:                        | <i>BMJ Open</i>                                                                                                                                                                                                                                                                                                                                                                                                                                                                                                                                                                                         |
| Manuscript ID                   | bmjopen-2020-044910.R1                                                                                                                                                                                                                                                                                                                                                                                                                                                                                                                                                                                  |
| Article Type:                   | Original research                                                                                                                                                                                                                                                                                                                                                                                                                                                                                                                                                                                       |
| Date Submitted by the Author:   | 14-Jan-2021                                                                                                                                                                                                                                                                                                                                                                                                                                                                                                                                                                                             |
| Complete List of Authors:       | Fanslow, Janet; The University of Auckland Faculty of Medical and Health Sciences, School of Population Health<br>Malihi, Zarintaj; The University of Auckland Faculty of Medical and Health Sciences, School of Population Health<br>Hashemi, Ladan; The University of Auckland Faculty of Medical and Health Sciences, School of Population Health<br>Gulliver, Pauline; The University of Auckland Faculty of Medical and Health Sciences, School of Population Health<br>McIntosh, Tracey; The University of Auckland Faculty of Arts, School of Māori Studies and Pacific Studies, Faculty of Arts |
| <b>Primary Subject Heading</b>: | Epidemiology                                                                                                                                                                                                                                                                                                                                                                                                                                                                                                                                                                                            |
| Secondary Subject Heading:      | Public health                                                                                                                                                                                                                                                                                                                                                                                                                                                                                                                                                                                           |
| Keywords:                       | PUBLIC HEALTH, EPIDEMIOLOGY, SOCIAL MEDICINE                                                                                                                                                                                                                                                                                                                                                                                                                                                                                                                                                            |
|                                 |                                                                                                                                                                                                                                                                                                                                                                                                                                                                                                                                                                                                         |

SCHOLARONE™  
Manuscripts



I, the Submitting Author has the right to grant and does grant on behalf of all authors of the Work (as defined in the below author licence), an exclusive licence and/or a non-exclusive licence for contributions from authors who are: i) UK Crown employees; ii) where BMJ has agreed a CC-BY licence shall apply, and/or iii) in accordance with the terms applicable for US Federal Government officers or employees acting as part of their official duties; on a worldwide, perpetual, irrevocable, royalty-free basis to BMJ Publishing Group Ltd ("BMJ") its licensees and where the relevant Journal is co-owned by BMJ to the co-owners of the Journal, to publish the Work in this journal and any other BMJ products and to exploit all rights, as set out in our [licence](#).

The Submitting Author accepts and understands that any supply made under these terms is made by BMJ to the Submitting Author unless you are acting as an employee on behalf of your employer or a postgraduate student of an affiliated institution which is paying any applicable article publishing charge ("APC") for Open Access articles. Where the Submitting Author wishes to make the Work available on an Open Access basis (and intends to pay the relevant APC), the terms of reuse of such Open Access shall be governed by a Creative Commons licence – details of these licences and which [Creative Commons](#) licence will apply to this Work are set out in our licence referred to above.

Other than as permitted in any relevant BMJ Author's Self Archiving Policies, I confirm this Work has not been accepted for publication elsewhere, is not being considered for publication elsewhere and does not duplicate material already published. I confirm all authors consent to publication of this Work and authorise the granting of this licence.



1  
2  
3 Title: Change in prevalence of psychological and economic abuse, and controlling behaviours  
4  
5 against women by an intimate partner in two cross-sectional studies in New Zealand, 2003-  
6  
7  
8 2019  
9

10  
11 Janet Fanslow, <sup>a</sup> Zarintaj Malihi <sup>a</sup>, Ladan Hashemi, <sup>a</sup> Pauline Gulliver,<sup>a</sup> and Tracey McIntosh<sup>b</sup>

12  
13 <sup>a</sup> *Social and Community Health, School of Population Health, Faculty of Medical and Health*  
14 *Sciences, University of Auckland, Auckland, New Zealand*

15 <sup>b</sup> *School of Māori Studies and Pacific Studies, Faculty of Arts, University of Auckland,*  
16 *Auckland, New Zealand*  
17

18  
19  
20  
21 \*Corresponding Author:  
22 Janet L. Fanslow  
23

24 Social and Community Health  
25 School of Population Health  
26 University of Auckland  
27 Private Bag 92019  
28 Auckland, 1142  
29 Auckland, New Zealand  
30  
31

32 [j.fanslow@auckland.ac.nz](mailto:j.fanslow@auckland.ac.nz)  
33  
34  
35  
36  
37

38 word count=3692  
39  
40  
41

42 keywords: change, prevalence rates, Intimate Partner Violence; psychological abuse; economic  
43  
44 abuse, controlling behaviour.  
45  
46  
47  
48  
49  
50  
51  
52  
53  
54  
55  
56  
57  
58  
59  
60

1  
2  
3 **Title: Change in prevalence of psychological and economic abuse, and controlling**  
4 **behaviours against women by an intimate partner in two cross-sectional studies in New**  
5 **Zealand, 2003-2019**  
6  
7  
8  
9

10  
11 **ABSTRACT**  
12

13  
14 **Objectives** Changes in reported lifetime prevalence of psychological abuse, controlling  
15 behaviours and economic abuse between 2003 and 2019, and past 12-month prevalence of  
16 psychological abuse by an intimate partner were examined.  
17  
18  
19

20  
21 **Design** Cross-sectional analysis.  
22

23  
24 **Setting and participants** Data came from two surveys of family violence in New Zealand,  
25 conducted in 2003 and 2019. Respondents were ever partnered women aged 18-64 years old  
26 (2003 n=2673; 2019 n=935).  
27  
28  
29

30  
31 **Main outcome measures** prevalence rates for psychological abuse, controlling behaviours and  
32 economic abuse were compared between the two study years using logistic regression.  
33 Sociodemographic and economic correlates of each abuse sub-type were investigated.  
34 Interactions were examined between sociodemographic factors and the study year for reported  
35 prevalence rates.  
36  
37  
38  
39  
40  
41  
42

43  
44 **Results** There was a reduction in reported past 12-month experience of two or more acts of  
45 psychological IPV from 8.4% (95% confidence interval CI=7.3-9.6) in 2003 to 4.7% (95%  
46 CI=3.2-6.2) in 2019. The reported lifetime prevalence of two or more acts of controlling  
47 behaviours increased from 8.2% in 2003 (95% CI=7.0, 9.5) to 13.4% in 2019 (95% CI=11.0-  
48 15.7). Lifetime prevalence of economic IPV also increased from 4.5% in 2003 (95% CI=3.5,  
49 5.5) to 8.9% in 2019 (95% CI=6.7-11.1). Those who were divorced/separated or cohabiting,  
50 and those living in the most deprived areas were more likely to report past year psychological  
51  
52  
53  
54  
55  
56  
57  
58  
59  
60

1  
2  
3 IPV, lifetime controlling behaviours and economic abuse. A higher proportion of women who  
4  
5 were married or cohabiting reported controlling behaviours in 2019 compared with 2003.  
6  
7

8 **Conclusion** While the reduction in reported past year psychological IPV is encouraging, the  
9  
10 increase in the lifetime prevalence of controlling behaviours and economic abuse from 2003 to  
11  
12 2019 is worth critical evaluation. Results highlight potential gaps in current IPV prevention  
13  
14 programmes, the need to identify and address underlying drivers of abusive behavior and the  
15  
16 importance of measuring multiple forms of IPV independently.  
17  
18  
19  
20  
21  
22  
23

#### 24 **Strengths and limitations of this study**

- 25
- 26
- 27 • The reported study used large, representative samples of women collected in 2003 and  
28 2019.
- 29
- 30 • Measures of lifetime exposure provide information on overall experience of seldom  
31 explored forms of IPV, including psychological abuse, controlling behaviours and  
32 economic abuse.
- 33
- 34 • Observed changes may reflect societal changes or environmental factors not  
35 considered in this investigation.
- 36
- 37 • Self-report of violence exposure, while the gold standard for data collection, may  
38 underestimate the true prevalence.
- 39
- 40 • Regular surveys of violence exposure can provide an understanding of the  
41 effectiveness of population-based policies and programmes and changes in the overall  
42 experience of different types of IPV.
- 43
- 44
- 45
- 46
- 47
- 48
- 49
- 50
- 51 • **Funding statement** This work was supported by the Health Research Council of New  
52 Zealand (Grant 02/207) for the 2003 study and the New Zealand Ministry of Business,  
53 Innovation and Employment, Contract number CONT-42799-HASTR-UOA for the  
54 2019 study.  
55  
56  
57  
58  
59  
60

- 1  
2  
3  
4  
5  
6  
7  
8  
9  
10  
11  
12  
13  
14  
15  
16  
17  
18  
19  
20  
21  
22  
23  
24  
25  
26  
27  
28  
29  
30  
31  
32  
33  
34  
35  
36  
37  
38  
39  
40  
41  
42  
43  
44  
45  
46  
47  
48  
49  
50  
51  
52  
53  
54  
55  
56  
57  
58  
59  
60
- We declare that there is no conflict of interest. The funding organizations had no role in the design and conduct of the study; in the collection, analysis, and interpretation of the data; and in the preparation, review, or approval of the manuscript.

For peer review only

## Introduction

Psychological abuse (also known as emotional abuse), economic abuse and controlling behaviours are tacit but prevalent types of intimate partner violence (IPV), which can result in serious health outcomes.[1–10] However, historically these types of violence have been neglected in research and practice[2,4,11] because of the focus on gaining recognition of physical and sexual IPV, and the challenges associated with the measurement of these behaviours. More recently, population-based studies have assessed the prevalence of recent (past 12-month) and lifetime experiences of psychological, economic abuse and controlling behaviours against women in high-income countries[1,12–14] and low and middle-income countries.[5,15–18]

At present, there is a lack of consensus on how to measure these forms of abuse. For example, some previous research has classified controlling behaviours and economic abuse under the larger umbrella of psychological/emotional abuse[2,6,7,19,20] while others report these as separate forms of abuse.[13,21,22] Similarly, there is a lack of consensus on the measurement of economic abuse, with economic control, employment sabotage, and economic exploitation three commonly identified tactics but which are not always measured.[23]

Previous research has found a strong correlation between the experience of physical, sexual violence and psychological and economic abuse[14,24,25] with some suggesting that psychological abuse may precede physical IPV.[26,27] Looking at patterns of change for these types of abuse at different time points can help us understand if they are distinct phenomena. Additionally, comparing results of prevalence rates and risk factors for psychological abuse, controlling behaviours and economic abuse in repeated cross sectional studies can help to identify trends, gaps and sociodemographic associates for these types of

1  
2  
3 abuse, independent of physical and sexual IPV, which may in turn inform the development of  
4  
5 better prevention strategies.  
6  
7

8  
9 New Zealand is one of a small number of countries [6,28–31] that has conducted repeated  
10  
11 population based surveys that have included measures of psychological abuse, controlling  
12  
13 behaviours and economic abuse. The first survey was conducted in 2003,[32] and the repeat  
14  
15 survey was conducted in 2019. Between the two surveys, a series of actions were taken to  
16  
17 address family violence including; legislation (e.g. amendments to family violence law and  
18  
19 protection for victims act)[33], and prevention campaigns (e.g. the Family Violence: It's not  
20  
21 ok campaign, and the ACC-funded mates and dates high school programme on healthy  
22  
23 relationships).[34,35] However, efforts have primarily focused on the recognition of and response  
24  
25 to physical and sexual abuse.  
26  
27

28  
29 In the current investigation, we sought to explore if there have been changes in the prevalence  
30  
31 of women's experience of psychological abuse, controlling behaviours and economic abuse  
32  
33 by intimate partners. In addition, we were interested in testing if any observed prevalence  
34  
35 changes were influenced by changes in women's sociodemographic characteristics. Finally,  
36  
37 to understand if different groups of women reported an increase or reduction between the two  
38  
39 survey waves, we explored interactions between participants' sociodemographic  
40  
41 characteristics and study year.  
42  
43  
44  
45  
46  
47  
48  
49  
50  
51  
52  
53  
54  
55  
56  
57  
58  
59  
60

## METHODS

### Study design, location, and participants

The present study used data from two national cross-sectional studies on family violence conducted in New Zealand in 2003 and 2019. The sampling framework was similar in both studies. Details on methods for these studies are published elsewhere [32,36]. In brief, in the 2003 study women were recruited from Auckland and North Waikato regions, and in the 2019 study women were recruited from Auckland, Waikato, and Northland. Cluster randomization was used for both studies. Meshblock boundaries, provided by Stats NZ, were used as the starting point for recruitment. Meshblocks are smallest statistical units that are used for the Census surveys. Non-residential and short-term residential properties, rest homes and retirement villages were excluded from both surveys. Interviewer training and support procedures were comparable across survey waves. The participants recruited for both surveys were broadly representative of women in the New Zealand population [32,36].

Ethics approval was received from the University of Auckland human participants ethics committee with reference numbers 2002/199 in 2003, and 2015/ 018244 in 2019.

### Patients and Public involvement

Patients or the public were not involved in the design, conduct or reporting or dissemination plans of the research.

**Eligibility:** Potential participants were household members who had been living in that address for at least one month, aged 18-64 years (for the 2003 study), or 16 years and above (for the 2019 study), and able to speak conversational English. In 2003, 2,674 ever-partnered women aged 18-64 were recruited, and in 2019, 2,888 (n=1464 women, n=1423 men, n=1

1  
2  
3 other) were recruited. To ensure comparability of the sample populations, only women aged  
4  
5 between 18 and 64 years were included in this investigation.  
6  
7

8 **Data collection** The questionnaire developed for the World Health Organization Multi-  
9  
10 Country Study on Domestic Violence and Women's Health (WHO MCS) was used to  
11  
12 measure violence against women in both studies.[37]  
13  
14

15  
16 For selection of individuals within a household, interviewers identified all woman aged over  
17  
18 16 years residing in the household. These were listed on the random selection form in order  
19  
20 of oldest to youngest, and interviewers only interviewed one randomly selected woman per  
21  
22 household, for safety reasons. Participants provided informed consent. No one over the age of  
23  
24 two years was present during the interview. All respondents were provided with a list of  
25  
26 approved support agencies regardless of disclosure status at the conclusion of the face-to-face  
27  
28 interview.  
29  
30

31  
32 The number of people invited and those who were interviewed and included in each of the  
33  
34 analyses are presented in **Figure 1**. The response rate relative to total eligible women was  
35  
36 66.9% in 2003 and 63.7% in 2019. The number of ever-partnered women aged 18-64 years  
37  
38 was 2,674 in 2003 and 944 in 2019. For economic abuse, in 2003 questions were asked for  
39  
40 currently partnered participants only. To ensure consistency, we used the currently partnered  
41  
42 sample for this outcome in 2019. This reduced the total sample size for economic abuse to  
43  
44 2,123 in 2003 and 802 in 2019. Weighting variables were not available for one woman from  
45  
46 2003 and nine from 2019 which reduced the total analytic sample to 2673 in 2003 and 935 in  
47  
48 2019 for psychological and controlling behaviors outcomes, and 2123 in 2003 and 794 in  
49  
50 2019 for economic abuse outcome.  
51  
52  
53  
54

### 55 56 **Outcome measures** 57 58 59 60



1  
2  
3 Outcome variables are defined in **Supplementary Table 1**. Questions used to assess IPV  
4 experience were identical in the two survey waves. We initially report on the prevalence of  
5 one or two or more acts for lifetime and past-year psychological abuse, as well as controlling  
6 behaviours. Further analyses considered only two or more acts of psychological abuse and  
7 controlling behaviours as a proxy for distinguishing a pattern of abuse rather than counting  
8 one-off incidents. We measured two acts of “economic control” in both surveys. Women who  
9 reported having experienced either or both acts were classified as having experienced  
10 economic abuse.  
11  
12

13 For psychological abuse, past 12-month and lifetime experience were measured at both study  
14 years. For controlling behaviours and economic abuse, only lifetime experience of the abuse  
15 was measured in both study years.  
16  
17

### 18 **Independent variables**

19 Sociodemographic variables such as age, education, relationship status, access to independent  
20 source of income and family support were self-reported by respondents. We used the Index of  
21 Multiple Deprivation (IMD) to determine area level deprivation.[38] See **Supplementary**  
22 **Table 2** for a description of independent variables.  
23  
24

### 25 **Statistical analyses:**

26 SAS statistical package (version 9.4) was used for data analyses (SAS Institute, Cary, NC,  
27 USA). Missing data were excluded from all analyses. These included: do not know or do not  
28 remember, and no responses.  
29  
30

31 Using the merged database, first, the study years were compared in terms of  
32 sociodemographic variables, independent source of income, area deprivation level, and  
33 family support using chi square tests.  
34  
35  
36  
37  
38  
39  
40  
41  
42  
43  
44  
45  
46  
47  
48  
49  
50  
51  
52  
53  
54  
55  
56  
57  
58  
59  
60

1  
2  
3 Then, the prevalence rates for each outcome were compared between the study years. For  
4 each of the three abuse types, results are presented as percentages (95% Confidence intervals  
5 [CI]). Then, to determine if there had been a change in estimated prevalence over time, odds  
6 ratio (OR) and 95% CIs for reported experience of each outcome were determined using  
7  
8 univariate logistic regression models in the merged database, with the study year as a  
9  
10 predictor.  
11  
12  
13  
14  
15  
16  
17

18 Then, the following steps were taken to address further research questions:  
19

- 20 1. The association between each independent variable and each outcome (psychological  
21 abuse, controlling behaviour and economic abuse) was explored using univariate  
22 logistic regression models with pooled data from 2003 and 2019.  
23  
24
- 25 2. To determine if the relationship between independent and outcome variables remained  
26 significant across data collection periods, those variables for which a significant  
27 association was identified at the univariate level were included in the multivariate  
28 analyses, including the study year. This also allowed us to assess if any changes in  
29 independent variables over time influenced prevalence changes between the study  
30 years. Potential confounders (e.g. age, education, relationship status, independent  
31 income, and area deprivation level) were also included in multivariate analyses.  
32  
33
- 34 3. To determine if the noted changes in the reported prevalence rates were consistent  
35 across population subgroups, interaction terms between each of the independent  
36 variables that reached significance and the study year were added to the multivariate  
37 regression models.  
38  
39  
40  
41  
42  
43  
44  
45  
46  
47  
48  
49  
50  
51  
52

53 All analyses were conducted with survey procedures to allow for stratification by sample  
54 location (three regions), clustering by primary sampling units (PSU), and weighting of data  
55 to account for the number of eligible participants in each household.  
56  
57  
58  
59  
60

## RESULTS

Sociodemographic differences between study samples are described in **Table 1**. There was a smaller proportion of people aged 55 years and older in the 2003 sample (14.7%) compared with the 2019 sample (23.3%), and a smaller proportion of participants with tertiary education in the 2003 sample (44.8%) compared with the 2019 sample (65.2%). In the 2003 sample, a higher proportion of participants had an independent income (80.0%) compared with the 2019 sample (73.0%).

**Table 1. Characteristics of ever-partnered women aged 18-64 years in the New Zealand family violence studies, conducted in 2003 and 2019.**

|                                  | 2003        | 2019       | p-value |
|----------------------------------|-------------|------------|---------|
| Total sample                     | n=2673      | n=935      |         |
| <b>Age (years)</b>               | n (%)*      | n (%)      | <0.001  |
| 18-<30                           | 401 (17.1)  | 113 (14.9) |         |
| 30-<45                           | 1219 (43.5) | 316 (31.0) |         |
| 45-<55                           | 637 (24.6)  | 264 (30.8) |         |
| >=55                             | 416 (14.7)  | 242 (23.3) |         |
| <b>Education</b>                 |             |            | <0.001  |
| Primary/secondary                | 1477 (55.2) | 310 (34.8) |         |
| Tertiary                         | 1187 (44.8) | 621 (65.2) |         |
| <b>Relationship status</b>       |             |            | 0.41    |
| Married                          | 1685 (61.5) | 598 (63.3) |         |
| Cohabiting                       | 574 (22.1)  | 196 (21.2) |         |
| Divorced/separated/<br>broken up | 352 (14.3)  | 116 (12.6) |         |
| Widowed/partner died             | 60 (2.1)    | 25 (2.9)   |         |
| <b>Independent income</b>        |             |            | <0.0006 |
| Yes                              | 2121 (79.6) | 688 (73.0) |         |
| No                               | 551 (20.4)  | 247 (27.0) |         |
| <b>Deprivation</b>               |             |            | 0.13    |
| Least deprived                   | 914 (33.6)  | 269 (26.8) |         |
| Moderately deprived              | 1045 (38.8) | 387 (39.8) |         |
| Most deprived                    | 707 (27.5)  | 279 (33.4) |         |
| <b>Family support</b>            |             |            | 0.07    |
| Yes                              | 2401 (90.1) | 850 (92.2) |         |
| No                               | 265 (9.8)   | 78 (7.8)   |         |

\*Weighted % are presented.

1  
2  
3 Table 2 shows the reported prevalence of experiencing past 12-month and lifetime  
4 psychological abuse by women in 2003 and 2019. There was no significant difference in  
5 reported lifetime prevalence estimates for psychological abuse between 2003 and 2019,  
6 however, a significant difference was found in reported past 12 month prevalence of  
7 experiencing at least one act of psychological abuse between 2003 and 2019 (OR=0.77; 95%  
8 CI= 0.61, 0.98) or two acts of psychological abuse, from 8.4% in 2003 to 4.7% in 2019 (OR  
9 =0.54; 95% CI=0.37, 0.77).

10  
11  
12  
13  
14  
15  
16  
17  
18  
19  
20 There was a significant increase in the reported lifetime prevalence rate of at least two acts of  
21 controlling behavior, from 8.2% in 2003 to 13.4% in 2019 (OR=1.72; 95% CI=1.32, 2.34).

22  
23 Similarly, there was an increase in the reported lifetime prevalence rate of one act of  
24 economic abuse, from 4.5% in 2003 to 8.9% in 2019 (OR=2.08; 95% CI=1.45, 2.97) (Table  
25  
26  
27  
28  
29  
30  
31  
32  
33  
34  
35  
36  
37  
38  
39  
40  
41  
42  
43  
44  
45  
46  
47  
48  
49  
50  
51  
52  
53  
54  
55  
56  
57  
58  
59  
60  
2).

**Table 2. Prevalence of recent (last 12 months) and lifetime psychological violence, lifetime economic abuse, and lifetime controlling behaviour against women aged 18-64 years in two cross-sectional studies in New Zealand and their changes**

| Violence type                                | Lifetime<br>n% (95%CI)*    |                           | Odds ratio<br>95%CI | Past 12 months<br>n% (95%CI) |                           | Odds ratio<br>95%CI |
|----------------------------------------------|----------------------------|---------------------------|---------------------|------------------------------|---------------------------|---------------------|
|                                              | 2003                       | 2019                      |                     | 2003                         | 2019                      |                     |
| <b>Psychological abuse (n)</b>               | (n=2673)                   | (n=935)                   |                     | (n=2673)                     | (n=935)                   |                     |
| Insulted                                     | 1216<br>45.8 (43.77-47.90) | 420<br>42.5 (38.72-46.34) | 0.87 (0.73-1.04)    | 368<br>14.8 (13.27-1.41)     | 104<br>11.2 (8.90-13.47)  | 0.72 (0.56- 0.93)   |
| Humiliated                                   | 805<br>30.1 (28.22-32.00)  | 303<br>30.5 (27.13-33.94) | 1.02 (0.85-1.22)    | 187<br>7.6 (6.47-8.68)       | 54<br>5.6 (4.03-7.09)     | 0.72 (0.51-1.00)    |
| Intimidated                                  | 705<br>26.4 (24.56-28.33)  | 245<br>24.8 (21.75-27.91) | 0.92 (0.76-1.11)    | 151<br>6.3 (5.18-7.34)       | 24<br>2.6 (1.52-3.79)     | 0.41 (0.25-0.66)    |
| Threatened                                   | 501<br>18.6 (16.96-20.20)  | 155<br>15.5 (13.08-18.00) | 0.81 (0.65-1.00)    | 78<br>3.2 (2.43-3.99)        | 10<br>1.2 (0.42-1.97)     | 0.36 (0.18, 0.69)   |
| At least one act of abuse                    | 1367<br>51.4 (49.37-53.47) | 489<br>49.3 (45.20-53.43) | 0.92 (0.76-1.10)    | 430<br>17.4 (15.67-19.06)    | 131<br>14.0 (11.58-16.40) | 0.77 (0.61-0.98)    |
| Two or more acts of abuse                    | 922<br>34.3 (32.39-36.32)  | 327<br>33.2 (29.83-36.60) | 0.95 (0.80, 1.13)   | 207<br>8.4 (7.25-9.57)       | 45<br>4.7 (3.24-6.15)     | 0.54 (0.37-0.77)    |
| <b>Economic abuse (n)</b>                    | 2123                       | 802                       |                     |                              |                           |                     |
| Taken her money                              | 53<br>2.7 (1.85-3.48)      | 45<br>5.6 (3.70-7.43)     | 2.15 (1.34-3.46)    |                              |                           |                     |
| Refused to give money for household expenses | 60<br>2.8 (2.10-3.58)      | 58<br>6.6 (4.89-8.40)     | 2.44 (1.65-3.60)    |                              |                           |                     |

|                                                                                   |                           |                           |                  |  |  |  |
|-----------------------------------------------------------------------------------|---------------------------|---------------------------|------------------|--|--|--|
| At least one act of abuse                                                         | 93<br>4.5 (3.47-5.49)     | 75<br>8.9 (6.72-11.07)    | 2.08 (1.45-2.97) |  |  |  |
| <b>Controlling Behaviour</b>                                                      |                           |                           |                  |  |  |  |
| Stopped her from seeing friends                                                   | 226<br>9.2 (7.89-10.50)   | 153<br>15.5 (13.09,18.00) | 1.82 (1.42-2.32) |  |  |  |
| Restricted contact with her family                                                | 132<br>5.3 (4.27-6.35)    | 84<br>8.5 (6.61-10.46)    | 1.67 (1.21-2.30) |  |  |  |
| Insisted to know where she is in ways that made her feel controlled or frightened | 458<br>18.1 (16.36-19.84) | 185<br>18.9 (16.23-21.68) | 1.06 (0.85-1.31) |  |  |  |
| At least one act of controlling behaviour                                         | 531<br>20.8 (18.96-22.57) | 223<br>22.6 (19.69-25.53) | 1.11 (0.92-1.36) |  |  |  |
| Two or more acts of controlling behaviour                                         | 199<br>8.2 (6.98-9.51)    | 132<br>13.4 (11.05-15.74) | 1.72 (1.32-2.34) |  |  |  |

\*Weighted % and 95%Cis are presented.

1  
2  
3  
4  
5  
6  
7  
8  
9  
10  
11  
12  
13  
14  
15  
16  
17  
18  
19  
20  
21  
22  
23  
24  
25  
26  
27  
28  
29  
30  
31  
32  
33  
34  
35  
36  
37  
38  
39  
40  
41  
42  
43  
44  
45  
46

1  
2  
3 **Table 3** shows the characteristics of women who reported experiencing two or more acts of  
4 lifetime and 12-month psychological abuse.  
5  
6

7  
8 *For 12-month psychological abuse:* The adjusted odds ratio in the multivariate model shows  
9 that after controlling for sociodemographic factors, and area deprivation level, there was still  
10 a significant decrease in the reported experience of past 12-month psychological abuse from  
11 2003 to 2019 (AOR=0.57; 95%CI=0.40, 0.82).  
12  
13  
14  
15  
16

17  
18 Age, relationship status and area deprivation level were significantly associated with  
19 reporting of two or more past 12-month psychological abuse at the multivariate level. A  
20 lower proportion of women aged  $\geq 45$  years reported experience of past 12-month  
21 psychological abuse compared with those aged 30 years and younger. A higher proportion of  
22 those who were cohabiting, or divorced compared with married reported this experience. As  
23 well, higher proportion of women who lived in the most deprived areas reported experience  
24 of this abuse type compared with women who lived in the least deprived areas.  
25  
26  
27  
28  
29  
30  
31  
32  
33  
34

35 *For lifetime psychological abuse:* No significant differences were found in reported  
36 prevalence rates of lifetime psychological abuse between the two study years, after  
37 controlling for sociodemographic factors, area deprivation level, and family support. Women  
38 aged 30 years and above were more likely to report having experienced two or more acts of  
39 lifetime psychological abuse. As well, those who were cohabiting and those who were  
40 divorced/separated were also more likely to report having experienced two/more acts of  
41 lifetime psychological abuse. As well, those who were cohabiting and those who were  
42 divorced/separated were also more likely to report having experienced two/more acts of  
43 lifetime psychological abuse. As well, those who were cohabiting and those who were  
44 divorced/separated were also more likely to report having experienced two/more acts of  
45 lifetime psychological abuse. As well, those who were cohabiting and those who were  
46 divorced/separated were also more likely to report having experienced two/more acts of  
47 lifetime psychological abuse. As well, those who were cohabiting and those who were  
48 divorced/separated were also more likely to report having experienced two/more acts of  
49 lifetime psychological abuse.  
50  
51  
52  
53  
54  
55  
56  
57  
58  
59  
60

**Table 3. Characteristics of women with a past-12 months and lifetime psychological intimate partner abuse in pooled database from two cross-sectional studies in New Zealand**

| Abuse type                   | Last 12 months psychological abuse |                |                   |                                          | Lifetime psychological abuse    |                |                   |                             |                                 |
|------------------------------|------------------------------------|----------------|-------------------|------------------------------------------|---------------------------------|----------------|-------------------|-----------------------------|---------------------------------|
|                              | Year                               | 2003           | 2019              | Univariate model odds ratio (OR) (95%CI) | *Multivariate model AOR (95%CI) | 2003           | 2019              | Univariate model OR (95%CI) | *Multivariate model AOR (95%CI) |
| Act of abuse                 | Two/More n (%)                     | Two/More n (%) |                   |                                          |                                 | Two/more n (%) | Two/more n (%)    |                             |                                 |
| <b>Year (ref=2003)</b>       | 207 (8.4)                          | 45 (4.7)       | 0.54 (0.37, 0.77) | 0.57 (0.40, 0.82)                        | 922 (34.3)                      | 327 (33.2)     | 0.95 (0.80, 1.13) | 0.97 (0.81, 1.16)           |                                 |
| <b>Age group (years)</b>     |                                    |                |                   |                                          |                                 |                |                   |                             |                                 |
| 18-<30                       | 50 (14.1)                          | 7 (6.3)        | 1.00              | 1.00                                     | 134 (33.0)                      | 32 (23.4)      | 1.00              | 1.00                        |                                 |
| 30-<45                       | 104 (8.8)                          | 19 (6.1)       | 0.68 (0.45, 0.93) | 0.79 (0.54, 1.16)                        | 435 (35.8)                      | 107 (33.1)     | 1.23 (0.98, 1.55) | 1.97 (1.52, 2.56)           |                                 |
| 45-<55                       | 34 (5.8)                           | 12 (4.2)       | 0.40 (0.26, 0.62) | 0.55 (0.34, 0.86)                        | 223 (34.5)                      | 97 (35.5)      | 1.21 (0.93, 1.56) | 2.10 (1.58, 2.80)           |                                 |
| >=55                         | 19 (4.8)                           | 7 (2.6)        | 0.30 (0.18, 0.49) | 0.44 (0.25, 0.75)                        | 130 (31.6)                      | 91 (36.8)      | 1.14 (0.88, 1.47) | 2.05 (1.54, 2.73)           |                                 |
| <b>Education</b>             |                                    |                |                   |                                          |                                 |                |                   |                             |                                 |
| Primary/secondary            | 131 (9.5)                          | 10 (3.7)       | 1.00              | -                                        | 540 (35.9)                      | 113 (33.8)     | 1.00              | -                           |                                 |
| Tertiary                     | 76 (7.2)                           | 35 (5.3)       | 0.76 (0.57, 1.01) | -                                        | 380 (32.5)                      | 212 (32.8)     | 0.88 (0.75, 1.02) |                             |                                 |
| <b>Relationship status</b>   |                                    |                |                   |                                          |                                 |                |                   |                             |                                 |
| Married                      | 87 (5.6)                           | 24 (3.9)       | 1.00              | 1.00                                     | 392 (23.1)                      | 157 (24.8)     | 1.00              | 1.00                        |                                 |
| Cohabiting                   | 66 (12.7)                          | 12 (6.0)       | 2.28 (1.64, 3.18) | 1.80 (1.26, 2.58)                        | 287 (49.2)                      | 88 (42.3)      | 2.91 (2.42, 3.50) | 3.74 (3.06, 4.57)           |                                 |
| Divorced/separated/broken up | 54 (15.2)                          | 8 (6.8)        | 2.79 (1.97, 3.95) | 2.52 (1.79, 3.54)                        | 223 (60.2)                      | 74 (61.5)      | 4.96 (3.95, 6.22) | 5.10 (4.04, 6.43)           |                                 |
| Widowed/partner died         | 0                                  | 1 (2.9)        | 0.19 (0.02, 1.38) | 0.23 (0.03, 1.70)                        | 19 (30.8)                       | 8 (26.5)       | 1.34 (0.82, 2.19) | 1.27 (0.77, 2.08)           |                                 |
| <b>Independent income</b>    |                                    |                |                   |                                          |                                 |                |                   |                             |                                 |
| Yes                          | 163 (8.2)                          | 33 (4.6)       | 0.98 (0.64, 1.28) | -                                        | 773 (36.0)                      | 248 (34.7)     | 1.41 (1.17, 1.70) | 1.20 (0.98, 1.47)           |                                 |
| No                           | 44 (9.3)                           | 12 (5.1)       | 1.00              |                                          | 148 (27.7)                      | 79 (29.1)      | 1.00              | 1.00                        |                                 |
| <b>Deprivation level</b>     |                                    |                |                   |                                          |                                 |                |                   |                             |                                 |
| Least deprived               | 51 (6.4)                           | 9 (3.2)        | 1.00              | 1.00                                     | 281 (31.6)                      | 80 (29.1)      | 1.00              | 1.00                        |                                 |
| Moderately deprived          | 83 (8.3)                           | 22 (5.8)       | 1.37 (0.97, 1.94) | 1.28 (0.91, 1.81)                        | 367 (34.6)                      | 141 (36.5)     | 1.20 (1.01, 1.43) | 1.10 (0.91, 1.32)           |                                 |
| Most deprived                | 73 (11.3)                          | 14 (4.6)       | 1.68 (1.16, 2.44) | 1.45 (1.02, 2.08)                        | 271 (37.5)                      | 106 (32.6)     | 1.25 (1.02, 1.53) | 1.06 (0.85, 1.31)           |                                 |
| <b>Having family support</b> |                                    |                |                   |                                          |                                 |                |                   |                             |                                 |
| Yes                          | 187 (8.4)                          | 41 (4.7)       | 1.01 (0.63, 1.61) | -                                        | 811 (33.8)                      | 285 (31.7)     | 0.72 (0.56, 0.92) | 0.73 (0.56, 1.47)           |                                 |
| No                           | 20 (8.6)                           | 3 (3.3)        | 1.00              | -                                        | 109 (39.5)                      | 36 (46.2)      | 1.00              | 1.00                        |                                 |



1  
2  
3 \*Odds ratios from logistic regression are calculated from the pooled database.

4 \*\* Model II odds ratios are adjusted for age, relationship status, deprivation status, and the year of the study for past 12-month psychological abuse while  
5 independent income and family support were additionally controlled for the lifetime psychological abuse.  
6

7 AOR=Adjusted odds ratio  
8  
9  
10  
11  
12  
13  
14  
15  
16  
17  
18  
19  
20  
21  
22  
23  
24  
25  
26  
27  
28  
29  
30  
31  
32  
33  
34  
35  
36  
37  
38  
39  
40  
41  
42  
43  
44  
45  
46

For peer review only

1  
2  
3 *Lifetime controlling behaviours:* The adjusted odds ratio shows that after controlling for  
4 sociodemographic variables, deprivation index and family support, the increase in prevalence  
5 rates of reporting two or more acts of controlling behaviours experienced remained  
6 significant (from 2003 to 2019; AOR=1.72; 95%CI=1.32, 2.24). Those who were cohabiting,  
7 divorced or separated, and widowed were more likely to report having experienced  
8 controlling behaviours compared with those who were married. Those who lived in the most  
9 deprived areas were more likely to report experiencing this abuse type, compared with those  
10 who lived in the least deprived areas (**Table 4**).

11  
12  
13 *Lifetime economic abuse:* The adjusted odds ratio shows that after controlling for  
14 sociodemographic variables and area deprivation level, the reported increase in prevalence  
15 rate of one act of economic abuse experience was still significant (AOR=1.84; 95%CI=1.30,  
16 2.62). Those aged 30 years and above, and those who were cohabiting were more likely to  
17 report experiencing economic abuse compared with those who were aged below 30 years, and  
18 those who were married, respectively. Similar to the previous abuse types, those who lived in  
19 the most deprived areas were more likely to report an experience of economic abuse  
20 compared with those who lived in the least deprived areas (**Table 4**).

**Table 4. Characteristics of women reporting lifetime experience of controlling behaviours and economic abuse by their intimate partner, in two cross-sectional New Zealand studies.**

| Abuse type                       | Controlling behaviour<br>% (95%CI) |                 | *Univariate<br>model          | **Multivariate<br>model | Economic abuse<br>% (95%CI) |                      | *Univariate<br>model I | **Multivariate<br>model II |
|----------------------------------|------------------------------------|-----------------|-------------------------------|-------------------------|-----------------------------|----------------------|------------------------|----------------------------|
|                                  | 2003                               | 2019            |                               |                         | 2003                        | 2019                 |                        |                            |
| Year                             |                                    |                 |                               |                         |                             |                      |                        |                            |
| Acts of abuse                    | <b>Two/more</b>                    | <b>Two/more</b> | <b>Odds Ratio<br/>(95%CI)</b> | <b>AOR (95%CI)</b>      | <b>One/<br/>more</b>        | <b>One/<br/>more</b> | <b>OR (95%CI)</b>      | <b>AOR (95%CI)</b>         |
|                                  | n (row%)                           | n (row%)        |                               |                         | n (row%)                    | n (row%)             |                        |                            |
| <b>Year (ref=2003)</b>           | 199 (8.2)                          | 132 (18.4)      | 1.72 (1.32, 2.24)             | 1.98 (1.47, 2.64)       | 93 (4.5)                    | 75 (8.9)             | 2.08 (1.45, 2.97)      | 1.84 (1.30, 2.62)          |
| <b>Age group</b>                 |                                    |                 |                               |                         |                             |                      |                        |                            |
| 18-<30                           | 36 (10.0)                          | 18 (13.1)       | 1.00                          | 1.00                    | 16 (5.9)                    | 7 (8.4)              | 1.00                   | 1.00                       |
| 30-<45                           | 91 (7.9)                           | 42 (13.2)       | 0.83 (0.57, 1.19)             | 1.06 (0.71, 1.57)       | 51 (5.3)                    | 24 (7.5)             | 0.85 (0.49, 1.47)      | 1.60 (1.30, 2.62)          |
| 45-<55                           | 43 (8.0)                           | 41 (14.7)       | 0.94 (0.63, 1.39)             | 1.18 (0.76, 1.84)       | 17 (3.1)                    | 25 (10.2)            | 0.82 (0.45, 1.46)      | 1.62 (0.85, 3.08)          |
| >=55                             | 30 (7.4)                           | 31 (12.1)       | 0.84 (0.55, 1.28)             | 0.84 (0.50, 1.40)       | 9 (3.3)                     | 19 (9.5)             | 0.83 (0.45, 1.55)      | 1.75 (0.89, 3.45)          |
| <b>Education</b>                 |                                    |                 |                               |                         |                             |                      |                        |                            |
| Primary/secondary                | 134 (9.7)                          | 54 (15.3)       | 1.00                          | -                       | 57 (5.2)                    | 28 (10.3)            | 1.00                   | -                          |
| Tertiary                         | 65 (6.5)                           | 78 (12.5)       | 0.78 (0.61, 1.00)             | -                       | 35 (3.6)                    | 46 (8.1)             | 0.84 (0.59, 1.18)      | -                          |
| p-value                          | <0.001                             | 0.06            |                               |                         | 0.13                        | 0.31                 |                        |                            |
| <b>Relationship status</b>       |                                    |                 |                               |                         |                             |                      |                        |                            |
| Married                          | 45 (3.1)                           | 53 (8.8)        | 1.00                          | 1.00                    | 55 (3.4)                    | 42 (6.1)             | 1.00                   | 1.00                       |
| Cohabiting                       | 37 (7.0)                           | 39 (18.9)       | 2.31 (1.64, 3.24)             | 2.30 (1.59, 3.33)       | 38 (8.8)                    | 33 (17.3)            | 3.07 (2.16, 4.34)      | 3.22 (2.21, 4.70)          |
| Divorced/separated/<br>broken up | 107 (31.2)                         | 36 (27.7)       | 8.84 (6.50,12.01)             | 8.88 (6.42,12.28)       | -                           | -                    |                        | -                          |
| Widowed/partner died             | 10 (15.2)                          | 4 (11.8)        | 3.30 (1.79, 6.11)             | 3.28 (1.65, 6.52)       | -                           | -                    |                        | -                          |
| <b>Independent income</b>        |                                    |                 |                               |                         |                             |                      |                        |                            |
| Yes                              | 168 (7.0)                          | 101 (14.0)      | 1.18 (0.85, 1.65)             | -                       | 67 (4.2)                    | 55 (8.6)             | 0.79 (0.53, 1.16)      | -                          |
| No                               | 30 (7.0)                           | 31 (11.7)       | 1.00                          | -                       | 26 (5.5)                    | 20 (9.6)             | 1.00                   | -                          |
| <b>Deprivation level</b>         |                                    |                 |                               |                         |                             |                      |                        |                            |
| Least deprived                   | 36 (4.9)                           | 29 (9.9)        | 1.00                          | 1.00                    | 19 (2.5)                    | 20 (7.3)             | 1.00                   | 1.00                       |
| Moderately deprived              | 76 (7.7)                           | 40 (10.1)       | 1.41 (0.97, 2.04)             | 1.11 (0.76, 1.63)       | 31 (3.8)                    | 25 (7.6)             | 1.37 (0.88, 2.13)      | 1.29 (0.83, 1.99)          |
| Most deprived                    | 86 (12.9)                          | 63 (20.1)       | 2.77 (1.92, 4.00)             | 2.30 (1.59, 2.84)       | 43 (8.5)                    | 30 (11.8)            | 2.83 (1.81, 4.42)      | 2.22 (2.21, 4.70)          |
| <b>Having family support</b>     |                                    |                 |                               |                         |                             |                      |                        |                            |

1  
2  
3  
4  
5  
6  
7  
8  
9  
10  
11  
12  
13  
14  
15  
16  
17  
18  
19  
20  
21  
22  
23  
24  
25  
26  
27  
28  
29  
30  
31  
32  
33  
34  
35  
36  
37  
38  
39  
40  
41  
42  
43  
44  
45  
46

| Abuse type    | Controlling behaviour<br>% (95%CI) |            | *Univariate<br>model  | **Multivariate<br>model | Economic abuse<br>% (95%CI) |              | *Univariate<br>model I | **Multivariate<br>model II |
|---------------|------------------------------------|------------|-----------------------|-------------------------|-----------------------------|--------------|------------------------|----------------------------|
|               | 2003                               | 2019       |                       |                         | 2003                        | 2019         |                        |                            |
| Year          |                                    |            |                       |                         |                             |              |                        |                            |
| Acts of abuse | Two/more                           | Two/more   | Odds Ratio<br>(95%CI) | AOR (95%CI)             | One/<br>more                | One/<br>more | OR (95%CI)             | AOR (95%CI)                |
|               | n (row%)                           | n (row%)   |                       |                         | n (row%)                    | n (row%)     |                        |                            |
| Yes           | 164 (7.6)                          | 112 (12.6) | 0.55 (0.39, 0.79)     | 0.64 (0.42, 0.96)       | 84 (4.4)                    | 64 (8.1)     | 0.70 (0.41, 1.19)      | -                          |
| No            | 35 (13.8)                          | 16 (19.7)  | 1.00                  | 1.00                    | 8 (4.8)                     | 10 (18.2)    | 1.00                   | -                          |

\* Odd ratios from logistic regression were calculated using the pooled database.

\*\* Odds ratios were adjusted for age, relationship status and deprivation status. For controlling behavior abuse, education status and having family support were also included in the multivariate model.

AOR=Adjusted odds ratio

For peer review only

1  
2  
3 There was a significant interaction between relationship status and study year for reports of  
4 two or more acts of controlling behaviour. A higher proportion of women who were married  
5 reported lifetime experience of controlling behaviours in 2019 (8.8%) compared with 2003  
6 (3.1%), as did women who were cohabiting (18.9% in 2019, and 7.0% in 2003). Although the  
7 highest prevalence rates for controlling behaviours were reported by women who were  
8 divorced, broken up or separated, the rates were not significantly different between the two  
9 survey years (**Table 5**; p-value for interaction=0.0002).

10  
11  
12 No other interactions were significant for reports of past 12-month and lifetime psychological  
13 abuse, or lifetime economic abuse.  
14  
15  
16  
17  
18  
19  
20  
21  
22  
23  
24  
25  
26  
27  
28  
29  
30  
31  
32  
33  
34  
35  
36  
37  
38  
39  
40  
41  
42  
43  
44  
45  
46  
47  
48  
49  
50  
51  
52  
53  
54  
55  
56  
57  
58  
59  
60

**Table 5. Interaction effects of relationship status on lifetime controlling behaviours, by the study year**

| Variable            | Level                            | Lifetime controlling behaviours ( $\geq 2$ acts) |                 | *Adjusted OR (95%CI) | P value for interaction test |
|---------------------|----------------------------------|--------------------------------------------------|-----------------|----------------------|------------------------------|
|                     |                                  | Year 1<br>N (%)                                  | Year 2<br>N (%) |                      |                              |
| Relationship status | Married                          | 45 (3.1)                                         | 53 (8.8)        | 3.54 (2.90, 5.47)    | 0.0002                       |
|                     | Cohabiting                       | 37 (7.0)                                         | 39 (18.9)       | 4.67 (2.74, 7.95)    |                              |
|                     | Divorced/separated/<br>broken up | 107 (31.2)                                       | 36 (27.7)       | 0.94 (0.56, 1.58)    |                              |
|                     | Widowed/ partner<br>died         | 10 (15.2)                                        | 4 (11.8)        | 1.33 (0.34, 5.13)    |                              |

\*Controlling for age, education, independent income, and deprivation level

## DISCUSSION

This study compared women's reports of prevalence rates of past 12-month and lifetime experience of psychological abuse, and the lifetime experience of economic abuse, and controlling behaviours by an intimate partner, as assessed through population-based studies conducted in 2003 and 2019. There was no difference in reported lifetime psychological abuse between the two years, with a third of women (33%-34%) in both surveys reporting having experienced at least two acts of psychological IPV in their lifetime. However, the proportion of women who reported past 12-month psychological abuse decreased significantly. In contrast, the reported lifetime prevalence of controlling behaviours doubled from 8.2% in 2003 to 18.4% in 2019, as did the reported lifetime prevalence of economic abuse (4.5% in 2003 to 8.9% in 2019).

There are three possible explanations for study findings, including: actual changes in perpetrator behavior over time; changes in women's reporting of experience of violent behavior due to changes in awareness of and willingness to report, and changes due to differences in methods, measurement or samples. These are discussed in turn.

There is some evidence that changes in perpetrator behavior may have occurred, as the reduction in the 12-month prevalence of psychological abuse between 2003 and 2019 is consistent with a reduction in 12-month prevalence of physical IPV noted in the same sample (Fanslow et al, BMJ Open, under revision). However, if the differences are based on actual changes in perpetrator behavior, then it also appears that there may have been a shift in the use of abusive tactics within intimate relationships, as indicated by the increase in the reported experience of controlling behaviours and economic abuse.[39] Similar patterns have been observed in intervention studies with men who perpetrate intimate partner violence, with reductions in physical, sexual, and verbal (psychological abuse) violence showing early change,[40] while changes in use of controlling and coercive tactics may be more uneven,

1  
2  
3 contradictory, and may take more time. [41] As controlling behaviours and economic abuse  
4 are seldom prosecuted or indeed recognized, the shift in tactics could be advantageous to  
5 those who use violence as they carry less risk of penalty.[23,42] It may also be that  
6 controlling behaviours and economic abuse have different drivers, and function differently in  
7 relationships than other forms of intimate partner violence.[18]  
8  
9

10  
11  
12  
13  
14  
15 If the observed changes reflect actual differences in use of these forms of intimate partner  
16 violence, then further exploration of the causes of such behavior change are warranted. There  
17 have been a series of strategies and campaigns implemented between the two study years,  
18 with a focus on sexual and physical IPV, which may have also contributed to a decline in the  
19 past 12-month psychological abuse.[41] National efforts such as the Family Violence: It's  
20 Not Ok Campaign may have contributed to this decrease, as there is some evidence that it had  
21 wide population reach.[40] Of note, however, controlling behaviours and economic abuse  
22 were not widely discussed in this prevention campaign. Further work is needed on  
23 identifying and addressing the underlying drivers of abusive behavior, such as issues of  
24 gender inequality, harmful conceptualizations of masculinity and femininity [42], and  
25 unpacking issues of power, control and entitlement. [43,44]  
26  
27  
28  
29  
30  
31  
32  
33  
34  
35  
36  
37  
38  
39  
40

41 While the increased prevalence of controlling behaviours and economic abuse could have  
42 resulted from changes in women's reporting of these experiences (as a function of increased  
43 recognition of and/or increased willingness to report such behaviors between 2003 and 2019),  
44 this interpretation seems less likely, as changes based solely on women's reporting would  
45 likely also have contributed to increased reports of psychological abuse. The increased  
46 reports of lifetime economic abuse, particularly among women aged 30 years and older,  
47 could also be reflective of other factors, including: greater exposure time (i.e., the women are  
48 older, so there is more time in which they may have experienced abuse); a greater likelihood  
49 of them having joint bank accounts or shared property, business, or other combined finances  
50  
51  
52  
53  
54  
55  
56  
57  
58  
59  
60



1  
2  
3 with their partners compared with their younger peers; or increased likelihood of being  
4 employed, which could yield more finances to be controlled.[13]  
5  
6

7  
8 Comparability of methods across the two surveys, including use of identical questions, lends  
9 strength to the interpretation that the prevalence changes observed are real. Additionally,  
10 while there some differences in the characteristics of the two samples, the adjusted odds ratio  
11 showed that after controlling for all socio-demographic factors, the observed differences in  
12 prevalence still remained significant.  
13  
14  
15  
16  
17  
18

19  
20 Additional survey waves would also facilitate confirmation or clarification of the within-  
21 population differences observed in the present study. Examples include the substantive  
22 increase in controlling behavior from 2003 to 2019 that mainly occurred among those who  
23 were married or cohabiting. While consistent with data from previous research[45] further  
24 research is needed to determine why this difference may exist. One possibility is that it is an  
25 example of “constraint through commitment” related to being constrained by one’s partner to  
26 uphold cultural conventions of heterosexual marriage [46]  
27  
28  
29  
30  
31  
32  
33  
34  
35  
36

37 Other findings from the present study are both consistent with previous research, and  
38 theoretically plausible enough to warrant current policy and programmatic action. These  
39 include the finding that having family support available in an emergency was associated with  
40 decreased risk of experiencing lifetime controlling behaviours, a finding consistent with other  
41 research that has noted the importance of social support as a protective factor against  
42 abuse.[28,45] Additionally, the finding that those living in the most deprived areas had  
43 increased odds of reporting lifetime controlling behaviour and economic abuse is consistent  
44 with previous research[28] and highlights the continued importance of implementing  
45 strategies to increase equity.  
46  
47  
48  
49  
50  
51  
52  
53  
54  
55  
56  
57  
58  
59  
60

1  
2  
3 **Limitations** The results are based on population samples from 2003 and 2019 with response  
4 rates of about 64%. Given that women who experience severe forms of violence are unlikely  
5 to participate in surveys such as that conducted, it is likely that the reported rates are an  
6 underestimate of the true prevalence. In addition, it is possible that changes between the two  
7 study years could be due to other societal, environmental factors that were not included in  
8 these analyses.  
9

10  
11 Measurement limitations also exist. These include the fact that measurement of forms of  
12 abuse for this study were based on a small number of questions for each IPV type. There was  
13 also no assessment of experience of economic abuse in the past 12 months, and the overall  
14 sample for those reporting economic abuse in 2019 was small. Measurement non-invariance  
15 may also limit our ability to accurately assess changes with different groups over time.  
16

17  
18 **Strengths and future study directions** This study included a large sample of women from  
19 two cross sectional studies on intimate partner violence conducted in 2003 and 2019. It is the  
20 first time that two survey samples with matching methods have compared three seldomly  
21 reported forms of IPV. Future qualitative and quantitative research is warranted to determine  
22 if the considerable increase reported in economic abuse and controlling behaviour represents  
23 a true change or is the result of increased awareness. Future studies could be strengthened by  
24 inclusion of a greater number of questions to assess different abuse types.  
25  
26

## 27 **Conclusion**

28  
29 In summary, the decrease in the reported prevalence of past 12-month psychological abuse is  
30 positive and consistent with the decrease in reported 12-month prevalence of physical IPV  
31 (Fanslow, *et al.*, *BMJ Open*, *under revision*). The increase in reported prevalence of  
32 economic abuse and controlling behaviours shows that these experiences should be measured  
33 separately and not conflated under the umbrella of psychological abuse.  
34  
35  
36  
37  
38  
39  
40  
41  
42  
43  
44  
45  
46  
47  
48  
49  
50  
51  
52  
53  
54  
55  
56  
57  
58  
59  
60

1  
2  
3 This also has relevance from a policy and practice perspective, as it indicates that controlling  
4 behaviours and economic abuse need their own recognition and response. Currently, in New  
5 Zealand law, they are considered as forms of psychological abuse.[47] It has been suggested  
6 that a legislative amendment to the Family Violence Act is needed to recognize economic  
7 abuse separately from psychological abuse,[48] however any legislative change would need  
8 enhanced understandings of these forms of violence and to be supported by procedural  
9 changes that enables prosecution of this form of abuse.[48] Further consideration is required  
10 to understand how to effectively prevent violence experience, including impacting on  
11 masculine norms.  
12  
13  
14  
15  
16  
17  
18  
19  
20  
21  
22  
23

24 Given the limited research available on the prevalence and consequences of controlling  
25 behaviour and economic abuse, the sharp increases in these behaviours noted in the present  
26 study suggest that further work is needed to understand the consequences of these behaviours  
27 and to develop appropriate prevention and mitigation strategies. Further survey waves would  
28 strengthen understanding of changes of the prevalence of violence that may be occurring the  
29 population.  
30  
31  
32  
33  
34  
35  
36  
37  
38

### 39 **Acknowledgments**

40 We gratefully acknowledge participants, the interviewers, and the study project team, led by  
41 Patricia Meagher-Lundberg. We also acknowledge the representatives from the Ministry of  
42 Justice, the Accident Compensation Corporation, the New Zealand Police, and the Ministry  
43 of Education, who were part of the Governance Group for Family and Sexual Violence at the  
44 inception of the study. The two cross-sectional studies from which this study used data are  
45 based on the WHO Violence Against Women Instrument as developed for use in the WHO  
46 Multi-Country Study on Women's Health and Domestic Violence and has been adapted from  
47 the version used in Asia and the Pacific by kNOwVAWdata Version 12.03). It adheres to the  
48 WHO ethical guidelines for the conduct of violence against women research  
49  
50  
51  
52  
53  
54

55 **Contributors:** Janet Fanslow (JF), Pauline Gulliver (PG), contributed to the conception and  
56 design of the study. Tracey McIntosh (TM) contributed to the application for funding of 2019  
57 study. Ladan Hashemi (LH) managed the data cleaning. LH and Zarintaj Malihi (ZM)  
58 conducted the analyses, ZM and JF interpreted the data, drafted the article and revised it. All  
59 authors contributed to the manuscript and approved the final version.  
60

1  
2  
3 **Ethics approval** was granted by the University of Auckland Human Participants Ethics  
4 Committee in 2003 (Ref number: 2002/199) and 2019 (Reference number 2015/ 018244).

5  
6 **Data availability statement** Data are unavailable due to the confidentiality and sensitivity of  
7 the data and Māori data sovereignty.  
8

9 **Competing interests** hereby we confirm that all authors read and understood BMJ policy on  
10 declaration of interests and have completed the ICMJE uniform disclosure form at  
11 [http://www.icmje.org/coi\\_disclosure.pdf](http://www.icmje.org/coi_disclosure.pdf) and declare that we received: no support from any  
12 organisation for the submitted work (or describe if any); no financial relationships with any  
13 organisations that might have an interest in the submitted work in the previous three years.  
14  
15  
16  
17  
18  
19  
20  
21  
22  
23  
24  
25  
26  
27  
28  
29  
30  
31  
32  
33  
34  
35  
36  
37  
38  
39  
40  
41  
42  
43  
44  
45  
46  
47  
48  
49  
50  
51  
52  
53  
54  
55  
56  
57  
58  
59  
60

For peer review only

## REFERENCES

- 1 Gibbs A, Dunkle K, Jewkes R. Emotional and economic intimate partner violence as key drivers of depression and suicidal ideation: A cross-sectional study among young women in informal settlements in South Africa. *PLoS One* 2018;**13**. doi:10.1371/journal.pone.0194885
- 2 Coker AL, Davis KE, Arias I, *et al*. Physical and mental health effects of intimate partner violence for men and women. *Am J Prev Med* 2002;**23**:260–8. doi:10.1016/S0749-3797(02)00514-7
- 3 Garcia-Moreno C, Jansen HA, Ellsberg M, *et al*. Prevalence of intimate partner violence: findings from the WHO multi-country study on women’s health and domestic violence. *Lancet* 2006;**368**:1260–9. doi:10.1016/S0140-6736(06)69523-8
- 4 Adams AE, Sullivan CM, Bybee D, *et al*. Development of the Scale of Economic Abuse. *Violence Against Women* 2008;**14**:563–88. doi:10.1177/1077801208315529
- 5 Krantz G, Vung ND. The role of controlling behaviour in intimate partner violence and its health effects: A population based study from rural Vietnam. *BMC Public Health* 2009;**9**:1–10. doi:10.1186/1471-2458-9-143
- 6 Smith, K; Zhang, X ; Basile KC, Merrick, M.T; Wang, T; Kresnow, M.J; Chen J. The National Intimate Partner and Sexual Violence Survey: 2015 Data Brief — Updated Release. Atlanta, Georgia: 2018. <https://www.cdc.gov/violenceprevention/pdf/2015data-brief508.pdf> (accessed 19 Apr 2020).
- 7 European Union Agency for Fundamental Rights (EUAFR). Violence against women: an EU-wide survey: Main results. Vienna: 2015. doi:10.2811/62230
- 8 Fanslow JL, Robinson EM. Sticks, Stones, or Words? Counting the Prevalence of Different Types of Intimate Partner Violence Reported by New Zealand Women. *J Aggress Maltreat Trauma* 2011;**20**:741–59. doi:10.1080/10926771.2011.608221
- 9 Australian Institute of Health and Welfare. *Family, domestic and sexual violence in Australia: continuing the national story 2019*. 2019. [www.aihw.gov.au](http://www.aihw.gov.au)
- 10 Family Violence Death Review Committee. Sixth report | Te Pūrongo tuaono Men who use violence | Ngā tāne ka whakamahi i te whakarekerekere. 2020.
- 11 Jewkes R. Emotional abuse: A neglected dimension of partner violence. *Lancet*. 2010;**376**:851–2. doi:10.1016/S0140-6736(10)61079-3
- 12 Smith PH, Thornton GE, DeVellis R, *et al*. A population-based study of the prevalence and distinctiveness of battering, physical assault, and sexual assault in intimate relationships. *Violence Against Women* 2002;**8**:1208–32. doi:10.1177/107780102320562691
- 13 Kutin J, Russell R, Reid M. Economic abuse between intimate partners in Australia: prevalence, health status, disability and financial stress. *Aust N Z J Public Health* 2017;**41**:269–74. doi:10.1111/1753-6405.12651
- 14 Karakurt G, Silver KE. Emotional abuse in intimate relationships: The role of gender and age. *Violence Vict* 2013;**28**:804–21.

- 1  
2  
3 15 Kapiga S, Harvey S, Muhammad AK, *et al.* Prevalence of intimate partner violence  
4 and abuse and associated factors among women enrolled into a cluster randomised trial  
5 in northwestern Tanzania. *BMC Public Health* 2017;**17**. doi:10.1186/s12889-017-  
6 4119-9  
7  
8 16 Kwaramba T, Ye JJ, Elahi C, *et al.* Lifetime prevalence of intimate partner violence  
9 against women in an urban Brazilian city: A cross-sectional survey. *PLoS One*  
10 2019;**14**:e0224204. doi:10.1371/journal.pone.0224204  
11  
12 17 Mendonça MFS de, Ludermir AB. Intimate partner violence and incidence of common  
13 mental disorder. *Rev Saude Publica* 2017;**51**:32. doi:10.1590/S1518-  
14 8787.2017051006912  
15  
16 18 Yount KM, Krause KH, VanderEnde KE. Economic Coercion and Partner Violence  
17 Against Wives in Vietnam: A Unified Framework? *J Interpers Violence*  
18 2015;**31**:3307–31. doi:10.1177/0886260515584350  
19  
20 19 Krug EG, Mercy JA, Dahlberg LL, *et al.* The world report on violence and health.  
21 *Lancet* 2002;**360**:1083–8. doi:10.1016/S0140-6736(02)11133-0  
22  
23 20 Ansara DL, Hindin MJ. Exploring gender differences in the patterns of intimate  
24 partner violence in Canada: A latent class approach. *J Epidemiol Community Health*  
25 2010;**64**:849–54. doi:10.1136/jech.2009.095208  
26  
27 21 Lövestad S, Löve J, Vaez M, *et al.* Prevalence of intimate partner violence and its  
28 association with symptoms of depression; A cross-sectional study based on a female  
29 population sample in Sweden. *BMC Public Health* 2017;**17**:1–11. doi:10.1186/s12889-  
30 017-4222-y  
31  
32 22 Beck JG, McNiff J, Clapp JD, *et al.* Exploring Negative Emotion in Women  
33 Experiencing Intimate Partner Violence: Shame, Guilt, and PTSD. *Behav Ther*  
34 2011;**42**:740–50. doi:10.1016/j.beth.2011.04.001  
35  
36 23 Stylianou AM. Economic Abuse Within Intimate Partner Violence: A Review of the  
37 Literature. *Violence Vict* 2018;**33**:3–22. doi:10.1891/0886-6708.33.1.3  
38  
39 24 Gondolf EW, Alex D, Kimmel CM. Nonphysical Abuse Among Batterer Program  
40 Participants. 2002.  
41  
42 25 Graham-Kevan N, Archer J. Does Controlling Behavior Predict Physical Aggression  
43 and Violence to Partners? *J Fam Viol* 2008;**23**:539–48. doi:10.1007/s10896-008-9162-  
44 y  
45  
46 26 O’Leary KD. Psychological abuse: A variable deserving critical attention in domestic  
47 violence. *Violence Vict* 1999;**14**:3–23. doi:10.1891/0886-6708.14.1.3  
48  
49 27 Schumacher JA, Leonard KE. Husbands’ and wives’ marital adjustment, verbal  
50 aggression, and physical aggression as longitudinal predictors of physical aggression  
51 in early marriage. *J Consult Clin Psychol* 2005;**73**:28–37. doi:10.1037/0022-  
52 006X.73.1.28  
53  
54 28 Lövestad S, Krantz G. Men’s and women’s exposure and perpetration of partner  
55 violence: An epidemiological study from Sweden. *BMC Public Health* 2012;**12**:945.  
56 doi:10.1186/1471-2458-12-945  
57  
58 29 Huang C-C, Postmus JL, Vikse JH, *et al.* Economic abuse, physical violence, and  
59  
60

- 1  
2  
3 union formation. *Child Youth Serv Rev* 2013;**35**:780–6.  
4 doi:10.1016/j.chilyouth.2013.01.020  
5
- 6 30 Stickley A, Carlson P. Factors associated with non-lethal violent victimization in  
7 Sweden in 2004-2007. *Scand J Public Health* 2010;**38**:404–10.  
8 doi:10.1177/1403494810364560  
9
- 10 31 Australian Institute of Health and Welfare. Family, domestic and sexual violence in  
11 Australia 2018. Australian Institute of Health and Welfare 2018.  
12
- 13 32 Fanslow J, Robinson E. Violence against women in New Zealand: prevalence and  
14 health consequences. *N Z Med J* 2004;**117**:1–12.  
15
- 16 33 Clearinghouse NZFV. Timeline | New Zealand Family Violence Clearinghouse.  
17 <https://nzfvc.org.nz/?q=timeline/2010/2100> (accessed 26 Aug 2020).  
18
- 19 34 Fenrich J, Contesse J. 'It's not OK': New Zealand's efforts to eliminate violence  
20 against women. Leitner Center for International Law and Justice 2009.  
21
- 22 35 Acc. Mates & Dates student survey - A summary of key findings 2015-2016. 2015.  
23
- 24 36 Fanslow, J; Gulliver, P; Hashemi, L; Malihi, Z; McIntosh T. Methods for the 2019  
25 New Zealand Family Violence Study -a study on the association between violence  
26 exposure, health and wellbeing. *Kōtuitui New Zeal J Soc Sci Online* 2020;**Online**.  
27 doi:10.1080/1177083X.2020.1862252  
28
- 29 37 Garcia-Moreno C, Jansen HA, Ellsberg M, *et al*. Prevalence of intimate partner  
30 violence: findings from the WHO multi-country study on women's health and  
31 domestic violence. *Lancet* 2006;**368**:1260–9. doi:10.1016/S0140-6736(06)69523-8  
32
- 33 38 Exeter DJ, Zhao J, Crengle S, *et al*. The New Zealand Indices of Multiple Deprivation  
34 (IMD): A new suite of indicators for social and health research in Aotearoa, New  
35 Zealand. *PLoS One* 2017;**12**:e0181260. doi:10.1371/journal.pone.0181260  
36
- 37 39 Rothman EF, Butchart A, Cerdá M. Intervening with Perpetrators of Intimate Partner  
38 Violence: A Global Perspective. Geneva: 2003. [www.inis.ie](http://www.inis.ie) (accessed 28 Aug 2020).  
39
- 40 40 Westmarland N, Kelly L. Domestic Violence Perpetrator Programmes: Steps towards  
41 change. Project Mirabal Final Report. 2015.  
42 [http://www.respect.uk.net/data/files/respect\\_research\\_briefing\\_note\\_1\\_what\\_counts\\_a](http://www.respect.uk.net/data/files/respect_research_briefing_note_1_what_counts_a_s_success.pdf)  
43 [s\\_success.pdf](http://www.respect.uk.net/data/files/respect_research_briefing_note_1_what_counts_a_s_success.pdf)  
44
- 45 41 Downes J, Kelly L, Westmarland N. 'It's a work in progress': Men's accounts of  
46 gender and change in their use of coercive control. *J Gender-Based Violence*  
47 2019;**3**:267–82. doi:10.1332/239868019X15627570242850  
48
- 49 42 UN Women. A FRAMEWORK TO UNDERPIN ACTION TO PREVENT  
50 VIOLENCE AGAINST WOMEN. United Nations. 2015.[https://www.unwomen.org/-/media/headquarters/attachments/sections/library/publications/2015/prevention\\_frame](https://www.unwomen.org/-/media/headquarters/attachments/sections/library/publications/2015/prevention_framework_unwomen_nov2015.pdf?la=en&vs=5223)  
51 [work\\_unwomen\\_nov2015.pdf?la=en&vs=5223](https://www.unwomen.org/-/media/headquarters/attachments/sections/library/publications/2015/prevention_framework_unwomen_nov2015.pdf?la=en&vs=5223) (accessed 12 Jan 2021).  
52  
53  
54
- 55 43 Pence E, Paymar M. *Education Groups for Men Who Batter: The Duluth Model: 9780826179906: Medicine & Health Science Books @ Amazon.com*. 1st editio. 1993.  
56 <https://www.amazon.com/Education-Groups-Men-Who-Batter/dp/0826179908>  
57 (accessed 12 Jan 2021).  
58  
59  
60

- 1  
2  
3 44 Anderson KL. Gendering coercive control. *Violence Against Women* 2009;**15**:1444–  
4 57. doi:10.1177/1077801209346837  
5  
6 45 Nybergh L, Taft C, Enander V, *et al.* Self-reported exposure to intimate partner  
7 violence among women and men in Sweden: Results from a population-based survey.  
8 *BMC Public Health* 2013;**13**:845. doi:10.1186/1471-2458-13-845  
9  
10 46 Crossman KA, Hardesty JL. Placing coercive control at the center: What are the  
11 processes of coercive control and what makes control coercive? *Psychol Violence*  
12 2017;**8**:196–206. doi:10.1037/vio0000094  
13  
14 47 Domestic Violence Amendment Act 2013 No 77 (as at 01 July 2019), Public Act –  
15 New Zealand Legislation. New Zeal. Gov.  
16 2019.[http://www.legislation.govt.nz/act/public/2013/0077/latest/whole.html#DLM561](http://www.legislation.govt.nz/act/public/2013/0077/latest/whole.html#DLM5615634)  
17 5634: (accessed 27 Aug 2020).  
18  
19 48 Milne S, Maury S, Gulliver P, *et al.* *Economic Abuse in New Zealand: Towards an*  
20 *understanding and response*. Christchurch: Good Shepherd Australia New Zealand  
21 2018. [www.goodshep.org.au](http://www.goodshep.org.au) (accessed 22 Apr 2020).  
22  
23  
24  
25  
26  
27  
28  
29  
30  
31  
32  
33  
34  
35  
36  
37  
38  
39  
40  
41  
42  
43  
44  
45  
46  
47  
48  
49  
50  
51  
52  
53  
54  
55  
56  
57  
58  
59  
60



1  
2  
3 **Figure legend:**  
4

5 **Figure 1** Flow diagram of female participants in the 2003 and 2019 population-based studies  
6 of family violence in New Zealand  
7  
8  
9  
10  
11  
12  
13  
14  
15  
16  
17  
18  
19  
20  
21  
22  
23  
24  
25  
26  
27  
28  
29  
30  
31  
32  
33  
34  
35  
36  
37  
38  
39  
40  
41  
42  
43  
44  
45  
46  
47  
48  
49  
50  
51  
52  
53  
54  
55  
56  
57  
58  
59  
60

For peer review only

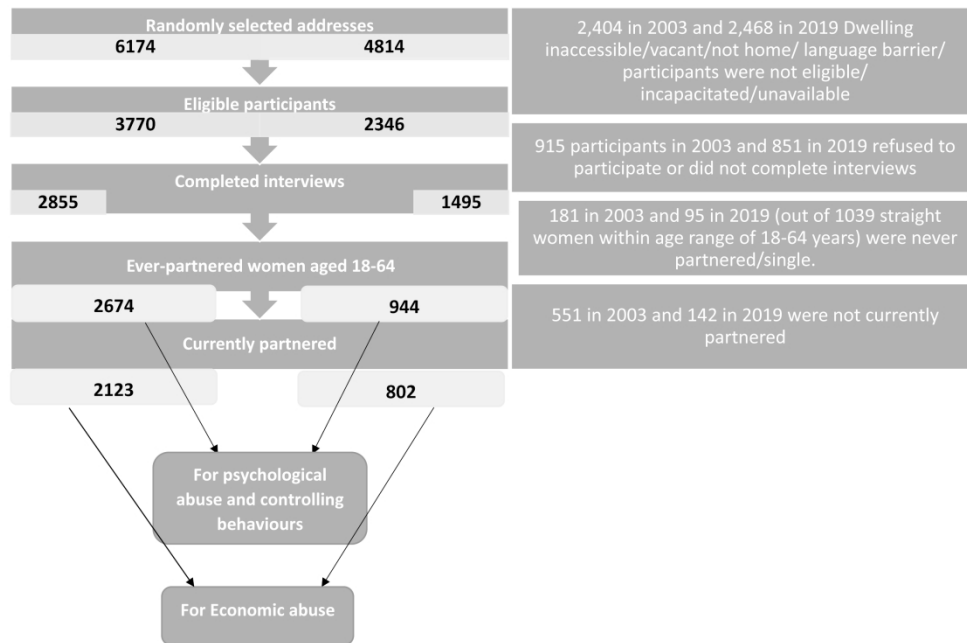

Figure 1 Flow diagram of included female participants in 2003 and 2019 population sample in New Zealand

245x164mm (300 x 300 DPI)

**Supplementary Table 1 Measurements of psychological, economic abuse and controlling behavior in 2003 and 2019**

|                                                                  |                               | 2003                                                                                                                                                | 2019                                                                                                                                 |
|------------------------------------------------------------------|-------------------------------|-----------------------------------------------------------------------------------------------------------------------------------------------------|--------------------------------------------------------------------------------------------------------------------------------------|
| Psychological abuse                                              | Insulted                      | Has your current husband / partner, or any other partner ever....<br>Insulted you or made you feel bad about yourself?                              | Has your current or any previous partner ever done any of the following things?<br>Insulted you or made you feel bad about yourself? |
|                                                                  | Humiliated                    | Belittled or humiliated you in front of other people?                                                                                               | Said or did something that made you feel humiliated in front of other people?                                                        |
|                                                                  | Intimidated                   | Done things to scare or intimidate you on purpose (e.g. by the way he looked at you, by yelling and smashing things)?                               | Did things that made you feel scared or intimidated?                                                                                 |
|                                                                  | Threatened                    | Threatened to hurt you or someone you care about?                                                                                                   | Threatened to harm you or someone you care about?                                                                                    |
| Economic abuse (Currently married / currently living with a man) | Taken money                   | Has your husband / partner ever taken your earnings or savings from you against your will?                                                          | Has any partner ever taken your earnings or savings from you against your will?                                                      |
|                                                                  | Refused to give money         | Does your husband /partner ever refuse to give you money for household expenses, even when he has money for other things?                           | Has any partner ever refused to give you money for household expenses, even when they have money for other things?                   |
| Controlling behavior                                             | Stopped seeing friends        | Thinking about your (current or most recent) husband, would you say it is generally true that he:<br>a) tries to keep you from seeing your friends? | Has your current, or any previous partner ever stopped you from seeing your friends?                                                 |
|                                                                  | Restricted to contact family  | Thinking about your (current or most recent) husband, tries to restrict contact with your family of birth?                                          | Has your current, or any previous partner ever Restricted contact with your family?                                                  |
|                                                                  | Insisted to know where she is | Thinking about your (current or most recent) husband, insists on knowing where you are at all times?                                                | Has your current, or any previous partner ever Insisted on knowing where you are in a way that made you feel controlled or afraid?   |

**Supplementary Table 2 Definitions of economic status and other confounding/ explanatory variables**

| Variable                            | Questions                                                                                                                                                                                                                                                                                                                                                                                                                        |
|-------------------------------------|----------------------------------------------------------------------------------------------------------------------------------------------------------------------------------------------------------------------------------------------------------------------------------------------------------------------------------------------------------------------------------------------------------------------------------|
| <b>Independent source of income</b> | Incomes from wages or investments, retirement income. It is a binary variable with Yes, and No answers.                                                                                                                                                                                                                                                                                                                          |
| <b>Deprivation level</b>            | Taken from NZ index of multiple deprivation (IMD) <sup>37</sup> a combination of routinely collected data from government departments and census data in seven domains (i.e. employment, income, crime, housing, health, education, and access to services) to develop a measure of deprivation at the neighborhood level. We classified participants as living in least deprived, moderately deprived, and most deprived areas. |
| <b>Support from family/ friends</b> | When you need help or have a problem, can you usually count on members of your family for support? Binary answer: Yes, No.                                                                                                                                                                                                                                                                                                       |

**STROBE 2007 (v4) Statement—Checklist of items that should be included in reports of *cross-sectional studies***

| Section/Topic                | Item # | Recommendation                                                                                                                                                                       | Reported on page #                |
|------------------------------|--------|--------------------------------------------------------------------------------------------------------------------------------------------------------------------------------------|-----------------------------------|
| <b>Title and abstract</b>    | 1      | (a) Indicate the study's design with a commonly used term in the title or the abstract                                                                                               | 1-2                               |
|                              |        | (b) Provide in the abstract an informative and balanced summary of what was done and what was found                                                                                  | 1-2                               |
| <b>Introduction</b>          |        |                                                                                                                                                                                      |                                   |
| Background/rationale         | 2      | Explain the scientific background and rationale for the investigation being reported                                                                                                 | 3-4                               |
| Objectives                   | 3      | State specific objectives, including any prespecified hypotheses                                                                                                                     | 4                                 |
| <b>Methods</b>               |        |                                                                                                                                                                                      |                                   |
| Study design                 | 4      | Present key elements of study design early in the paper                                                                                                                              | 1 and 5                           |
| Setting                      | 5      | Describe the setting, locations, and relevant dates, including periods of recruitment, exposure, follow-up, and data collection                                                      | 5                                 |
| Participants                 | 6      | (a) Give the eligibility criteria, and the sources and methods of selection of participants                                                                                          | 5                                 |
| Variables                    | 7      | Clearly define all outcomes, exposures, predictors, potential confounders, and effect modifiers. Give diagnostic criteria, if applicable                                             | 6-7                               |
| Data sources/<br>measurement | 8*     | For each variable of interest, give sources of data and details of methods of assessment (measurement). Describe comparability of assessment methods if there is more than one group | 5-7, supplementary tables 1 and 2 |
| Bias                         | 9      | Describe any efforts to address potential sources of bias                                                                                                                            | 6                                 |
| Study size                   | 10     | Explain how the study size was arrived at                                                                                                                                            | 6                                 |
| Quantitative variables       | 11     | Explain how quantitative variables were handled in the analyses. If applicable, describe which groupings were chosen and why                                                         | 6-7                               |
| Statistical methods          | 12     | (a) Describe all statistical methods, including those used to control for confounding                                                                                                | 7                                 |
|                              |        | (b) Describe any methods used to examine subgroups and interactions                                                                                                                  | 7                                 |
|                              |        | (c) Explain how missing data were addressed                                                                                                                                          | 7                                 |
|                              |        | (d) If applicable, describe analytical methods taking account of sampling strategy                                                                                                   | NA                                |
|                              |        | (e) Describe any sensitivity analyses                                                                                                                                                | NA                                |
| <b>Results</b>               |        |                                                                                                                                                                                      |                                   |

|                          |     |                                                                                                                                                                                                              |                            |
|--------------------------|-----|--------------------------------------------------------------------------------------------------------------------------------------------------------------------------------------------------------------|----------------------------|
| Participants             | 13* | (a) Report numbers of individuals at each stage of study—eg numbers potentially eligible, examined for eligibility, confirmed eligible, included in the study, completing follow-up, and analysed            | Page 6, Figure 1           |
|                          |     | (b) Give reasons for non-participation at each stage                                                                                                                                                         | Figure 1                   |
|                          |     | (c) Consider use of a flow diagram                                                                                                                                                                           | Figure 1                   |
| Descriptive data         | 14* | (a) Give characteristics of study participants (eg demographic, clinical, social) and information on exposures and potential confounders                                                                     | Page 6 and page 9, Table 1 |
|                          |     | (b) Indicate number of participants with missing data for each variable of interest                                                                                                                          | Figure 1                   |
| Outcome data             | 15* | Report numbers of outcome events or summary measures                                                                                                                                                         | Table 2                    |
| Main results             | 16  | (a) Give unadjusted estimates and, if applicable, confounder-adjusted estimates and their precision (eg, 95% confidence interval). Make clear which confounders were adjusted for and why they were included | Table 3 and table 4        |
|                          |     | (b) Report category boundaries when continuous variables were categorized                                                                                                                                    | NA                         |
|                          |     | (c) If relevant, consider translating estimates of relative risk into absolute risk for a meaningful time period                                                                                             | NA                         |
| Other analyses           | 17  | Report other analyses done—eg analyses of subgroups and interactions, and sensitivity analyses                                                                                                               | Table 5                    |
| <b>Discussion</b>        |     |                                                                                                                                                                                                              |                            |
| Key results              | 18  | Summarise key results with reference to study objectives                                                                                                                                                     | 21                         |
| Limitations              | 19  | Discuss limitations of the study, taking into account sources of potential bias or imprecision. Discuss both direction and magnitude of any potential bias                                                   | 22                         |
| Interpretation           | 20  | Give a cautious overall interpretation of results considering objectives, limitations, multiplicity of analyses, results from similar studies, and other relevant evidence                                   | 23                         |
| Generalisability         | 21  | Discuss the generalisability (external validity) of the study results                                                                                                                                        | 23                         |
| <b>Other information</b> |     |                                                                                                                                                                                                              |                            |
| Funding                  | 22  | Give the source of funding and the role of the funders for the present study and, if applicable, for the original study on which the present article is based                                                | 2                          |

\*Give information separately for cases and controls in case-control studies and, if applicable, for exposed and unexposed groups in cohort and cross-sectional studies.

**Note:** An Explanation and Elaboration article discusses each checklist item and gives methodological background and published examples of transparent reporting. The STROBE checklist is best used in conjunction with this article (freely available on the Web sites of PLoS Medicine at <http://www.plosmedicine.org/>, Annals of Internal Medicine at <http://www.annals.org/>, and Epidemiology at <http://www.epidem.com/>). Information on the STROBE Initiative is available at [www.strobe-statement.org](http://www.strobe-statement.org).
