# Supplementary material for: Change in prevalence of psychological and economic abuse, and controlling behaviours against women by an intimate partner in two cross-sectional studies in New Zealand, 2003 and 2019
Source: PubMed Central journal article supplement — BMJ Open. 2021 Mar 23;11(3):e044910. doi: 10.1136/bmjopen-2020-044910 (PMC7993235; doi:10.1136/bmjopen-2020-044910), 2021-03-23
Supplement: bmjopen-2020-044910supp001.pdf [file bmjopen-2020-044910supp001.pdf]

**Supplementary Table 1 Measurements of psychological, economic abuse and behavior in 2003 and 2019**

|                                                                     |                               | 2003                                                                                                                                                | 2019                                                                                                                                 |
|---------------------------------------------------------------------|-------------------------------|-----------------------------------------------------------------------------------------------------------------------------------------------------|--------------------------------------------------------------------------------------------------------------------------------------|
| Psychological abuse                                                 | Insulted                      | Has your current husband / partner, or any other partner ever....<br>Insulted you or made you feel bad about yourself?                              | Has your current or any previous partner ever done any of the following things?<br>Insulted you or made you feel bad about yourself? |
|                                                                     | Humiliated                    | Belittled or humiliated you in front of other people?                                                                                               | Said or did something that made you feel humiliated in front of other people?                                                        |
|                                                                     | Intimidated                   | Done things to scare or intimidate you on purpose (e.g. by the way he looked at you, by yelling and smashing things)?                               | Did things that made you feel scared or intimidated?                                                                                 |
|                                                                     | Threatened                    | Threatened to hurt you or someone you care about?                                                                                                   | Threatened to harm you or someone you care about?                                                                                    |
| Economic abuse<br>(Currently married / currently living with a man) | Taken money                   | Has your husband / partner ever taken your earnings or savings from you against your will?                                                          | Has any partner ever taken your earnings or savings from you against your will?                                                      |
|                                                                     | Refused to give money         | Does your husband /partner ever refuse to give you money for household expenses, even when he has money for other things?                           | Has any partner ever refused to give you money for household expenses, even when they have money for other things?                   |
| Controlling behavior                                                | Stopped seeing friends        | Thinking about your (current or most recent) husband, would you say it is generally true that he:<br>a) tries to keep you from seeing your friends? | Has your current, or any previous partner ever stopped you from seeing your friends?                                                 |
|                                                                     | Restricted to contact family  | Thinking about your (current or most recent) husband, tries to restrict contact with your family of birth?                                          | Has your current, or any previous partner ever Restricted contact with your family?                                                  |
|                                                                     | Insisted to know where she is | Thinking about your (current or most recent) husband, insists on knowing where you are at all times?                                                | Has your current, or any previous partner ever Insisted on knowing where you are in a way that made you feel controlled or afraid?   |
