# Supplementary material for: Change in prevalence of psychological and economic abuse, and controlling behaviours against women by an intimate partner in two cross-sectional studies in New Zealand, 2003 and 2019
Source: PubMed Central journal article supplement — BMJ Open. 2021 Mar 23;11(3):e044910. doi: 10.1136/bmjopen-2020-044910 (PMC7993235; doi:10.1136/bmjopen-2020-044910), 2021-03-23
Supplement: bmjopen-2020-044910supp002.pdf [file bmjopen-2020-044910supp002.pdf]

**Supplementary Table 2. Definitions of economic status and other confounding/ explanatory variables**

| Variable                            | Questions                                                                                                                                                                                                                                                                                                                                                                                                                        |
|-------------------------------------|----------------------------------------------------------------------------------------------------------------------------------------------------------------------------------------------------------------------------------------------------------------------------------------------------------------------------------------------------------------------------------------------------------------------------------|
| <b>Independent source of income</b> | Income from wages, investments, or retirement income. It is a binary variable with Yes, and No answers.                                                                                                                                                                                                                                                                                                                          |
| <b>Deprivation level</b>            | Taken from NZ index of multiple deprivation (IMD) <sup>37</sup> a combination of routinely collected data from government departments and census data in seven domains (i.e. employment, income, crime, housing, health, education, and access to services) to develop a measure of deprivation at the neighborhood level. We classified participants as living in least deprived, moderately deprived, and most deprived areas. |
| <b>Support from family/ friends</b> | When you need help or have a problem, can you usually count on members of your family for support? Binary answer: Yes, No.                                                                                                                                                                                                                                                                                                       |
